# Supplementary material for: Differential Spatiotemporal Expression of Type I and Type II Cadherins Associated With the Segmentation of the Central Nervous System and Formation of Brain Nuclei in the Developing Mouse
Source: Front Mol Neurosci. 2021 Mar 23;14:633719. doi: 10.3389/fnmol.2021.633719 (PMC8021962; doi:10.3389/fnmol.2021.633719)
Supplement: Supplementary Table 1 — Abbreviations of neuroanatomical structures of the dorsal pallium (A), subpallium (B), and the entire CNS (C) described in the Allen Reference Mouse Brain Atlas (https://atlas.brain-map.org/). [file Table_1.xlsx]

## Sheet: Table 1A. Dorsal Pallium
Supplementary Table 1A. Dorsal Pallium. Abbreviations and structure_id numbers used in the Allen Reference Atlas of the Developing Mouse Brain.
Structure_id	Structure name	Acronym	Ontogenetic st_level
16001	dorsal pallium/isocortex	DPall	7
16002	frontal cortex	FCx	8
16003	ventricular zone of FCx	FCv	9
16004	mantle zone of FCx	FCm	9
16005	periventricular stratum of FCx (subventricular zone)	FCp	10
16006	intermediate stratum of FCx (white matter/subplate)	FCi	10
16007	superficial stratum of FCx (cortical plate/marginal zone)	FCs	10
16008	layer 1 of FCx	FC-1	11
16009	layer 2 of FCx	FC-2	11
16010	layer 3 of FCx	FC-3	11
16011	layer 4 of FCx	FC-4	11
16012	layer 5 of FCx	FC-5	11
16013	layer 6 of FCx	FC-6	11
16014	sublayer 6a of FCx	FC-6a	12
16015	sublayer 6b of FCx	FC-6b	12
16016	parietal cortex	PCx	8
16017	ventricular zone of PCx	PCv	9
16018	mantle zone of PCx	PCm	9
16019	periventricular stratum of PCx (subventricular zone)	PCp	10
16020	intermediate stratum of PCx (white matter/subplate)	PCi	10
16021	superficial stratum of PCx (cortical plate/marginal zone)	PCs	10
16022	layer 1 of PCx	PC-1	11
16023	layer 2 of PCx	PC-2	11
16024	layer 3 of PCx	PC-3	11
16025	layer 4 of PCx	PC-4	11
16026	layer 5 of PCx	PC-5	11
16027	layer 6 of PCx	PC-6	11
16028	sublayer 6a of PCx	PC-6a	12
16029	sublayer 6b of PCx	PC-6b	12
16030	occipital cortex	OCx	8
16031	ventricular zone of OCx	OCv	9
16032	mantle zone of OCx	OCm	9
16033	periventricular stratum of OCx (subventricular zone)	OCp	10
16034	intermediate stratum of OCx (white matter/subplate)	OCi	10
16035	superficial stratum of OCx (cortical plate/marginal zone)	OCs	10
16036	layer 1 of OCx	OC-1	11
16037	layer 2 of OCx	OC-2	11
16038	layer 3 of OCx	OC-3	11
16039	layer 4 of OCx	OC-4	11
16040	layer 5 of OCx	OC-5	11
16041	layer 6 of OCx	OC-6	11
16042	sublayer 6a of OCx	OC-6a	12
16043	sublayer 6b of OCx	OC-6b	12
16044	temporal cortex	TCx	8
16045	ventricular zone of TCx	TCv	9
16046	mantle zone of TCx	TCm	9
16047	periventricular stratum of TCx (subventricular zone)	TCp	10
16048	intermediate stratum of TCx (white matter/subplate)	TCi	10
16049	superficial stratum of TCx (cortical plate/marginal zone)	TCs	10
16050	layer 1 of TCx	TC-1	11
16051	layer 2 of TCx	TC-2	11
16052	layer 3 of TCx	TC-3	11
16053	layer 4 of TCx	TC-4	11
16054	layer 5 of TCx	TC-5	11
16055	layer 6 of TCx	TC-6	11
16056	sublayer 6a of TCx	TC-6a	12
16057	sublayer 6b of TCx	TC-6b	12
16058	insular cortex	InsCx	8
16059	ventricular zone of InsCx	InsCv	9
16060	mantle zone of InsCx	InsCm	9
16061	periventricular stratum of InsCx (subventricular zone)	InsCp	10
16062	intermediate stratum of InsCx (white matter/subplate)	InsCi	10
16063	superficial stratum of InsCx (cortical plate/marginal zone)	InsCs	10
16064	layer 1 of InsCx	InsC-1	11
16065	layer 2 of InsCx	InsC-2	11
16066	layer 3 of InsCx	InsC-3	11
16067	layer 4 of InsCx	InsC-4	11
16068	layer 5 of InsCx	InsC-5	11
16069	layer 6 of InsCx	InsC-6	11
16070	sublayer 6a of InsCx	InsC-6a	12
16071	sublayer 6b of InsCx	InsC-6b	12
16072	cingulate cortex	CCx	8
16073	ventricular zone of CCx	CCv	9
16074	mantle zone of CCx	CCm	9
16075	periventricular stratum of CCx (subventricular zone)	CCp	10
16076	intermediate stratum of CCx (white matter/subplate)	CCi	10
16077	superficial stratum of CCx (cortical plate/marginal zone)	CCs	10
16078	layer 1 of CCx	CC-1	11
16079	layer 2 of CCx	CC-2	11
16080	layer 3 of CCx	CC-3	11
16081	layer 4 of CCx	CC-4	11
16082	layer 5 of CCx	CC-5	11
16083	layer 6 of CCx	CC-6	11
16084	sublayer 6a of CCx	CC-6a	12
16085	sublayer 6b of CCx	CC-6b	12
16086	perirhinal-ectorhinal cortex	PERCx	8
16087	layer 1 of PRh-Ect	PRh-Ect-1	11
16088	layer 2 of PRh-Ect	PRh-Ect-2	11
16089	layer 3 of PRh-Ect	PRh-Ect-3	11
16090	layer 4 of PRh-Ect	PRh-Ect-4	11
16091	layer 5 of PRh-Ect	PRh-Ect-5	11
16092	layer 6 of PRh-Ect	PRh-Ect-6	11
16093	retrosplenial cortex	RSCx	8
16094	layer 1 of RSC	RSC-1	11
16095	layer 2 of RSC	RSC-2	11
16096	layer 3 of RSC	RSC-3	11
16097	layer 4 of RSC	RSC-4	11
16098	layer 5 of RSC	RSC-5	11
16099	layer 6 of RSC	RSC-6	11
16100	layer 6a of RSC	RSC-6a	12
16101	layer 6b of RSC	RSC-6b	12
16102	entorhinal cortex	ERCx	8
16103	ventricular zone of ERCx	ERv	9
16104	mantle zone of ERCx	ERm	9
16105	periventricular stratum of ERCx (subventricular zone)	ERp	10
16106	intermediate stratum of ERCx (white matter/subplate)	ERi	10
16107	superficial stratum of ERCx (cortical plate/marginal zone)	ERs	10
16108	layer 1 of ERCx	ER-1	11
16109	layer 2 of ERCx	ER-2	11
16110	layer 3 of ERCx	ER-3	11
16111	layer 4 of ERCx	ER-4	11
16112	layer 5 of ERCx	ER-5	11
16113	layer 6 of ERCx	ER-6	11

## Sheet: Table 1B. Supallium 
Supplementary Table 1B. Subpallium. Abbreviations and structure_id numbers used in the Allen Reference Atlas of the Developing Mouse Brain.
Structure_id	Structure name	Acronym	Ontogenetic st_level
15751	subpallium	SPall	6
15752	subpallial septum	SeSPall	7
15753	diagonal part of septum	DgSe	8
15765	pallidal septum	PalSe	8
15774	striatal septum	StrSe	8
15754	ventricular zone of DgSe	DgSev	9
15755	mantle zone of DgSe	DgSem	9
15766	ventricular zone of PalSe	PalSev	9
15767	mantle zone of PalSe	PalSem	9
15775	ventricular zone of StrSe	StrSev	9
15776	mantle zone of StrSe	StrSem	9
15756	periventricular stratum of DgSe	DgSep	10
15759	intermediate stratum of DgSe	DgSei	10
15762	superficial stratum of DgSe	DgSes	10
15768	periventricular stratum of PalSe	PalSep	10
15770	intermediate stratum of PalSe	PalSei	10
15773	superficial stratum of PalSe	PalSes	10
15777	periventricular part of StrSe	StrSep	10
15781	intermediate part of StrSe	StrSei	10
15783	superficial part of StrSe	StrSes	10
15757	lateral septal nucleus, ventral part	LSV	11
15758	median supracommissural nucleus	MnSC	11
15760	lateral septal nucleus, intermedio-ventral part	LSIV	11
15761	septohypothalamic nucleus	SHy	11
15763	vertical nucleus of the diagonal band	VDB	11
15764	medial septal nucleus	MS	11
15769	lateral septal nucleus, intermediate part, periventricular	LSIp	11
15771	lateral septal nucleus, intermedio-intermediate part	LSII	11
15772	lambdoid septal zone	Ld	11
15778	lateral septal nucleus, dorsal part	LSD	11
15779	triangular septal nucleus	TS	11
15780	septofimbrial nucleus	SFi	11
15782	lateral septal nucleus, intermedio-dorsal part	LSID	11
15784	paraseptal subpallium	PaSe	7
15785	septodiagonal transition area	SeDg	8
15797	septopallidal transition area	SePal	8
15809	septostriatal transition area (accumbens)	SeStr	8
15786	ventricular zone of SeDg	SeDgv	9
15787	mantle zone of SeDg	SeDgm	9
15798	ventricular zone of SePal	SePalv	9
15799	mantle zone of SePal	SePalm	9
15810	ventricular zone of SeStr	SeStrv	9
15811	mantle zone of SeStr	SeStrm	9
15788	periventricular stratum of SeDg	SeDgp	10
15792	intermediate stratum of SeDg	SeDgi	10
15795	superficial stratum of SeDg	SeDgs	10
15800	periventricular stratum of SePal	SePalp	10
15803	intermediate stratum of SePal	SePali	10
15806	superficial stratum of SePal	SePals	10
15812	periventricular stratum of SeStr	SeStrp	10
15814	intermediate stratum of SeStr	SeStri	10
15816	superficial stratum of SeStr	SeStrs	10
15789	bed nucleus of the stria terminalis, medioseptal division	BSTMS	11
15793	substantia innominata/basal nucleus, transitional part	SIBT	11
15794	bed nucleus of the anterior commissure	BAC	11
15796	horizontal nucleus of the diagonal band, transitional part	HDBT	11
15801	bed nucleus of the stria terminalis, lateroseptal division	BSTLS	11
15804	septopallidal core nucleus	SePalCo	11
15805	septopallidal shell area	SePalSh	11
15807	septopallidal part of the olfactory tuberculum	TuSePal	11
15808	island of Calleja major	ICjM	11
15813	accumbens nucleus, core domain	AcbCo	11
15815	accumbens nucleus, shell domain	AcbSh	11
15817	septostriatal part of the olfactory tuberculum	TuSeStr	11
15790	nucleus of the stria terminalis, medial division, ventral part	BSTMv	12
15791	nucleus of the stria terminalis, medial division, anterior part	BSTMa	12
15802	nucleus of the stria terminalis, lateral division, intermediate part	BSTLi	12
15818	central subpallium (classic basal ganglia)	CSPall	7
15819	diagonal domain	Dg	8
15834	pallidum (globus pallidus complex)	Pal	8
15851	striatum (corpus striatum)	Str	8
15820	ventricular zone of Dg	Dgv	9
15821	mantle zone of Dg	Dgm	9
15835	ventricular zone of Pal	Palv	9
15836	mantle zone of Pal	Palm	9
15852	ventricular zone of Str	Strv	9
15853	mantle zone of Str	Strm	9
15822	periventricular stratum of Dg	Dgp	10
15828	intermediate stratum of Dg	Dgi	10
15831	superficial stratum of Dg	Dgs	10
15837	periventricular stratum of Pal	Palp	10
15842	intermediate stratum of Pal	Pali	10
15845	superficial stratum of Pal	Pals	10
15854	periventricular stratum of Str	Strp	10
15856	intermediate stratum of Str	Stri	10
15861	superficial stratum of Str	Strs	10
15823	bed nucleus of the stria terminalis, mediocentral division	BSTMC	11
15827	extended amygdala, diagonal part	EADg	11
15829	substantia innominata/basal nucleus	SIB	11
15830	internal globus pallidus	IPal	11
15832	horizontal nucleus of the diagonal band	HDB	11
15833	magnocellular diagonal band nucleus	MCDB	11
15838	bed nucleus of the stria terminalis, laterocentral division	BSTLC	11
15843	external globus pallidum	EPal	11
15844	ventral pallidum	VPal	11
15846	pallidal part of olfactory tuberculum	TuPal	11
15847	plexiform layer of TuPal	TuPal1	12
15848	corticoid layer of TuPal	TuPal2	12
15849	polymorph layer of TuPal	TuPal3	12
15850	pallidal islands of Calleja	ICjPal	11
15855	caudate nucleus	Cau	11
15857	putamen	Put	11
15858	ventral striatum	VStr	11
15859	interstitial nucleus of the posterior limb of the anterior commissure	IPAC	11
15860	laterostriatal stripe	LSS	11
15862	striatal part of olfactory tuberculum	TuStr	11
15863	plexiform layer of TuStr	TuStr1	12
15864	corticoid layer of TuStr	TuStr2	12
15865	polymorph layer of TuStr	TuStr3	12
15866	striatal islands of Calleja	ICjStr	11
15824	posteromedial part of BSTMC	BSTMpm	12
15825	posterointermediate part of BSTMC	BSTMpi	12
15826	posterolateral part of BSTMC	BSTMpl	12
15839	posterior part of BSTLC	BSTLp	12
15840	juxtacapsular part of BSTLC	BSTLj	12
15841	dorsal part of BSTLC	BSTLd	12
15867	subpallial amygdala	ASPall	7
15868	striatal amygdala	AStr	8
15878	pallidal amygdala	APal	8
15886	diagonal amygdala	ADg	8
15893	hypothalamic amygdala	AHy	8
15887	ventricular zone of ADg	ADgv	9
15888	mantle zone of ADg	ADgm	9
15869	ventricular zone of AStr	AStrv	9
15870	mantle zone of AStr	AStrm	9
15879	ventricular zone of APal	APalv	9
15880	mantle zone of APal	APalm	9
15894	ventricular zone of AHy	AHyv	9
15895	mantle zone of AHy	AHym	9
15871	periventricular stratum of AStr	AStrp	10
15873	intermediate stratum of AStr	AStri	10
15877	superficial stratum of AStr	AStrs	10
15881	periventricular stratum of APal	APalp	10
15883	intermediate stratum of APal	APali	10
15885	superficial stratum of APal	APals	10
15889	periventricular stratum of ADg	ADgp	10
15891	intermediate stratum of ADg	ADgi	10
15892	superficial stratum of ADg	ADgs	10
15896	periventricular stratum of AHy	AHyp	10
15897	intermediate stratum of AHy	AHyi	10
15898	superficial stratum of AHy	AHys	10
15872	amygdalo-striatal transition	ASt	11
15874	central amygdalar nucleus, lateral part	CeL	11
15875	central amygdalar nucleus, capsular part	CeC	11
15876	intercalated amygdaloid nuclei	IA	11
15882	bed nucleus of stria terminalis, lateral amygdaloid division	BSTLA	11
15884	central amygdaloid nucleus, medial part	CeM	11
15890	bed nucleus of the stria terminalis, medial amygdaloid division	BSTMA	11
15899	medial amygdala, posterodorsal part	MePD	11
15900	medial amygdala, posteroventral part	MePV	11
15901	medial amygdala, anterodorsal part	MeAD	11
15902	medial amygdala, anteroventral part	MeAV	11

## Sheet: Table 1C. Mouse CNS
Supplementary Table 1C. Mouse CNS abbreviations and structure_id numbers used in the Allen Reference Atlas of the Developing Mouse Brain.
structure_id	Structure name	acronym	Ontology_st_ level
15564	Mus musculus	mouse	-1
15565	neural plate	NP	0
17735	landmark tracts	tracts	0
15566	forebrain	F	1
16649	midbrain	M	1
16808	hindbrain	H	1
17651	spinal cord	SpC	1
15567	secondary prosencephalon	SP	2
16308	diencephalon	D	2
16809	prepontine hindbrain	PPH	2
17092	pontine hindbrain	PH	2
17220	pontomedullary hindbrain	PMH	2
17352	medullary hindbrain (medulla)	MH	2
15568	rostral secondary prosencephalon	RSP	3
15738	caudal secondary prosencephalon	CSP	3
16309	prosomere 3	p3	3
16375	prosomere 2	p2	3
16509	prosomere 1	p1	3
16650	mesomere 1	m1	3
16751	mesomere 2 (preisthmus or caudal midbrain)	m2	3
16810	isthmus	is	3
16915	rhombomere 1	r1	3
17023	rhombomere 2	r2	3
17093	rhombomere 3	r3	3
17156	rhombomere 4	r4	3
17221	rhombomere 5	r5	3
17290	rhombomere 6	r6	3
17353	rhombomere 7	r7	3
17416	rhombomere 8	r8	3
17476	rhombomere 9	r9	3
17538	rhombomere 10	r10	3
17596	rhombomere 11	r11	3
15569	preoptic telencephalon	POTel	4
15622	terminal hypothalamus (rostral hypothalamus)	THy	4
15739	telencephalic vesicle	Tel	4
16211	peduncular (caudal) hypothalamus	PHy	4
16310	prethalamus	PTh	4
16352	prethalamic tegmentum	PThTg	4
16376	thalamus	Th	4
16486	thalamic tegmentum	ThTg	4
16510	pretectum	Pt	4
16623	pretectal tegmentum	PtTg	4
16651	collicular (rostral) midbrain tectum	MTt	4
16725	m1 (rostral) midbrain tegmentum	MTg	4
16752	preisthmic midbrain tectum	PIsTt	4
16790	preisthmic tegmentum	PIsTg	4
15570	preoptic roof plate	POR	5
15576	preoptic alar plate	POA	5
15623	alar part of terminal hypothalamus	THyA	5
15666	basal part of terminal hypothalamus	THyB	5
15736	floor of terminal hypothalamus	THyF	5
15740	roof plate of evaginated telencephalic vesicle	TelR	5
15750	alar plate of evaginated telencephalic vesicle	TelA	5
16212	alar part of peduncular hypothalamus	PHyA	5
16247	basal peduncular hypothalamus	PHyB	5
16306	floor of peduncular hypothalamus	PHyF	5
16311	roof plate of p3	p3R	5
16313	alar plate of p3 (alar prethalamus)	p3A	5
16353	basal plate of p3	p3B	5
16368	floor plate of p3	p3F	5
16377	roof plate of p2 (epithalamic roofplate)	p2R	5
16382	alar plate of p2 (alar thalamus)	p2A	5
16487	basal plate of p2	p2B	5
16502	floor plate of p2	p2F	5
16511	roof plate of p1	p1R	5
16519	alar plate of p1	p1A	5
16624	basal plate of p1	p1B	5
16641	floor plate of p1	p1F	5
16652	roof plate of m1	m1R	5
16658	alar plate of m1	m1A	5
16726	basal plate of m1	m1B	5
16742	floor plate of m1	m1F	5
16753	m2 roof	m2R	5
16754	m2 alar plate	m2A	5
16791	m2 basal plate	m2B	5
16805	m2 floor plate	m2F	5
16811	isthmic roof plate	isR	5
16813	isthmic alar plate	isA	5
16876	isthmic basal plate	isB	5
16911	isthmic floor plate	isF	5
16916	r1 roof plate	r1R	5
16919	r1 alar plate	r1A	5
16967	r1 basal plate	r1B	5
17022	r1 floor plate	r1F	5
17024	r2 roof plate	r2R	5
17025	r2 alar plate	r2A	5
17053	r2 basal plate	r2B	5
17091	r2 floor plate	r2F	5
17094	r3 roof plate	r3R	5
17095	r3 alar plate	r3A	5
17123	r3 basal plate	r3B	5
17155	r3 floor plate	r3F	5
17157	r4 roof plate	r4R	5
17158	r4 alar plate	r4A	5
17182	r4 basal plate	r4B	5
17219	r4 floor plate	r4F	5
17222	r5 roof plate	r5R	5
17223	r5 alar plate	r5A	5
17250	r5 basal plate	r5B	5
17289	r5 floor plate	r5F	5
17291	r6 roof plate	r6R	5
17292	r6 alar plate	r6A	5
17318	r6 basal plate	r6B	5
17351	r6 floor plate	r6F	5
17354	r7 roof plate	r7R	5
17355	r7 alar plate	r7A	5
17380	r7 basal plate	r7B	5
17415	r7 floor plate	r7F	5
17417	r8 roof plate	r8R	5
17418	r8 alar plate	r8A	5
17437	r8 basal plate	r8B	5
17475	r8 floor plate	r8F	5
17477	r9 roof plate	r9R	5
17478	r9 alar plate	r9A	5
17500	r9 basal plate	r9B	5
17537	r9 floor plate	r9F	5
17539	r10 roof plate	r10R	5
17540	r10 alar plate	r10A	5
17562	r10 basal plate	r10B	5
17595	r10 floor plate	r10F	5
17597	r11 roof plate	r11R	5
17598	r11 alar plate	r11A	5
17620	r11 basal plate	r11B	5
17650	r11 floor plate	r11F	5
17652	SpC roof plate	SpR	5
17653	SpC alar plate	SpA	5
17692	SpC basal plate (anterior horn)	SpB	5
17734	SpC floor plate	SpF	5
15577	preoptic area	PO	6
15613	preopto-hypothalamic band	POH	6
15624	terminal paraventricular area of THyA	TPaA	6
15634	eye vesicle, stalk/nerve	ES	6
15635	eye vesicle, pigmented retina	EPg	6
15636	eye vesicle, neural retina	EN	6
15653	terminal subparaventricular area of THyA	TSPaA	6
15667	dorsal part of THyB	THyB-D	6
15684	intermediate part of THyB	THyB-I	6
15702	ventral part of THyB	THyB-V	6
15712	perimammillary part of THyB	THyB-P	6
15722	mammillary part of THyB	THyB-M	6
15737	mammillary floor	MamF	6
15749	telencephalic choroidal formation	TCh	6
15751	subpallium	SPall	6
15903	pallium	Pall	6
16205	telencephalo-hypothalamic transition area	TelH	6
16213	peduncular paraventricular area of PHyA	PPaA	6
16233	peduncular subparaventricular area	PSPa	6
16248	dorsal part of PHyB	PHyB-D	6
16259	intermediate part of PHyB	PHyB-I	6
16274	ventral part of PHyB	PHyB-V	6
16285	perimammillary part of PHyB	PHyB-P	6
16294	mammillary part of PHyB	PHyB-M	6
16307	retromammillary floor	RMaF	6
16312	choroidal tissue of p3	p3Ch	6
16314	dorsal part of alar p3	p3AD	6
16322	lateral part of alar p3	p3AL	6
16332	posteroventral part of alar p3	p3APV	6
16378	choroidal tissue of p2	p2Ch	6
16380	pineal gland (epiphysis) and stalk	Pi	6
16381	retrohabenular thalamic area	RHb	6
16383	dorsal part of alar p2	p2AD	6
16395	lateral part of alar p2	p2AL	6
16466	anteroventral part of alar thalamus	p2AAV	6
16512	bed area of the posterior commissure	PCom	6
16520	precommissural pretectal domain	PcP	6
16548	juxtacommissural pretectal domain	JcP	6
16578	commissural pretectal domain	CoP	6
16612	ventrolateral part of alar p1	p1AVL	6
16659	dorsal part of m1A	m1AD	6
16668	dorsolateral part of m1A	m1ADL	6
16703	lateral part of alar m1	m1AL	6
16716	ventrolateral part of alar m1	m1AVL	6
16755	dorsal part of m2A	m2AD	6
16762	dorsolateral part of m2A	m2ADL	6
16771	lateral part of m2A	m2AL	6
16780	ventrolateral part of m2A	m2AVL	6
16843	dorsolateral (non-cerebellar) part of isA	isADL	6
16864	ventrolateral part of isA	isAVL	6
15752	subpallial septum	SeSPall	7
15784	paraseptal subpallium	PaSe	7
15818	central subpallium (classic basal ganglia)	CSPall	7
15867	subpallial amygdala	ASPall	7
15904	ventral pallium	VPall	7
15956	lateral pallium	LPall	7
16001	dorsal pallium/isocortex	DPall	7
16114	medial pallium (hippocampal allocortex)	MPall	7
16198	pallial septum	SePall	7
16295	retromammillary area	RMa	7
16315	prethalamic eminence	PThE	7
16323	reticular complex	RtC	7
16333	prethalamic (p3) zona limitans domain	p3ZL	7
16343	zona incerta complex	ZIC	7
16384	habenula (old epithalamus)	Hb	7
16396	dorsal tier of thalamus	DTTh	7
16437	intermediate tier of thalamus	ITTh	7
16453	ventral tier of thalamus	VTTh	7
16467	thalamic (p2) zona limitans domain	p2ZL	7
16476	liminal part of alar p2	p2Lim	7
16521	dorsal part of PcP	PcPD	7
16530	lateral part of PcP	PcPL	7
16539	ventral part of PcP	PcPV	7
16549	dorsal part of JcP	JcPD	7
16559	lateral part of JcP	JcPL	7
16569	ventral part of JcP	JcPV	7
16579	dorsal part of CoP	CoPD	7
16591	lateral part of CoP	CoPL	7
16602	ventral part of CoP	CoPV	7
16613	liminal part of alar p1	p1Lim	7
16669	tectal gray formation	TG	7
16678	colliculus superior	SC	7
16692	inferior colliculus	IC	7
16717	liminal alar domain of m1	m1Lim	7
16781	liminal alar domain of m2	m2Lim	7
16814	cerebellar vermis	CbV	7
16844	parabrachial complex	PBC	7
16854	isthmus proper	Ist	7
16865	liminal part of alar isthmus	isLim	7
16877	lateral part of the isB	isBL	7
16887	intermediate part of isB	isBI	7
16897	medial part of the isB	isBM	7
16920	cerebellar hemisphere	CbH	7
16950	r1 part of vestibular sensory column	r1Ve	7
16954	r1 part of trigeminal sensory column	r1Tr	7
16959	liminal part of alar r1	r1Lim	7
16968	lateral part of r1B	r1BL	7
16984	intermediate part of r1B	r1BI	7
16994	medial part of r1B	r1BM	7
17026	r2 part of cochlear sensory column	r2Co	7
17031	r2 part of vestibular sensory column	r2Ve	7
17036	r2 part of trigeminal sensory column	r2Tr	7
17042	liminal part of r2 alar plate	r2Lim	7
17054	lateral part of r2B	r2BL	7
17066	intermediate part of r2B	r2BI	7
17079	medial part of r2B	r2BM	7
17096	r3 part of cochlear sensory column	r3Co	7
17101	r3 part of vestibular sensory column	r3Ve	7
17107	r3 part of trigeminal sensory column	r3Tr	7
17113	liminal part of r3 alar plate	r3Lim	7
17124	lateral part of r3B	r3BL	7
17132	intermediate part of r3B	r3BI	7
17143	medial part of r3B	r3BM	7
17159	r4 part of cochlear sensory column	r4Co	7
17164	r4 part of vestibular sensory column	r4Ve	7
17170	r4 part of trigeminal sensory column	r4Tr	7
17176	liminal part of r4 alar plate	r4Lim	7
17183	lateral part of r4B	r4BL	7
17196	intermediate part of r4B	r4BI	7
17207	medial part of r4B	r4BM	7
17224	r5 part of the cochlear column	r5Co	7
17229	r5 part of the vestibular column	r5Ve	7
17235	r5 part of the trigeminal column	r5Tr	7
17242	liminal part of the r5 alar plate	r5Lim	7
17251	lateral part of r5B	r5BL	7
17266	intermediate part of r5B	r5BI	7
17275	medial part of r5B	r5BM	7
17293	r6 part of the cochlear column	r6Co	7
17298	r6 part of the vestibular column	r6Ve	7
17304	r6 part of the trigeminal column	r6Tr	7
17311	liminal part of the r6 alar plate	r6Lim	7
17319	lateral part of r6B	r6BL	7
17328	intermediate part of r6B	r6BI	7
17338	medial part of r6B	r6BM	7
17356	r7 part of cochlear column	r7Co	7
17361	r7 part of the vestibular column	r7Ve	7
17366	r7 part of the trigeminal column	r7Tr	7
17373	liminal part of the r7 alar plate	r7Lim	7
17381	lateral part of r7B	r7BL	7
17390	intermediate part of r7B	r7BI	7
17400	medial part of r7B	r7BM	7
17419	r8 part of the vestibular column	r8Ve	7
17424	r8 part of the trigeminal column	r8Tr	7
17431	liminal part of the r8 alar plate	r8Lim	7
17438	lateral part of r8B	r8BL	7
17449	intermediate part of r8B	r8BI	7
17460	medial part of r8B	r8BM	7
17479	r9 part of the vestibular column	r9Ve	7
17485	r9 part of the trigeminal column	r9Tr	7
17494	liminal part of the r9 alar plate	r9Lim	7
17501	lateral part of r9B	r9BL	7
17512	intermediate part of r9B	r9BI	7
17523	medial part of r9B	r9BM	7
17541	r10 part of the vestibular column	r10Ve	7
17547	r10 part of the trigeminal column	r10Tr	7
17556	liminal part of the r10 alar plate	r10Lim	7
17563	lateral part of r10B	r10BL	7
17571	intermediate part of r10B	r10BI	7
17581	medial part of r10B	r10BM	7
17599	r11 part of the vestibular column	r11Ve	7
17603	r11 part of the trigeminal column	r11Tr	7
17612	liminal part of the r11 alar plate	r11Lim	7
17621	lateral part of r11B	r11BL	7
17629	intermediate part of r11B	r11BI	7
17638	medial part of r11B	r11BM	7
17654	medial (cornucommissural) part of the spinal alar plate	SpAM	7
17666	lateral (dorsal horn) part of the spinal alar plate	SpAL	7
17677	ventral (liminal) part of the spinal alar plate	SpAV	7
17693	lateral part of SpB	SpBL	7
17710	intermediate part of SpB	SpBI	7
17725	medial part of SpB	SpBM	7
15571	rostral septocommissural area	RSCom	8
15578	lamina terminalis area	LTer	8
15587	first (dorsal) preoptic domain	PO1	8
15599	second (ventral) preoptic domain	PO2	8
15723	mammillary area	Mam	8
15741	caudal septocommissural area	CSCom	8
15753	diagonal part of septum	DgSe	8
15765	pallidal septum	PalSe	8
15774	striatal septum	StrSe	8
15785	septodiagonal transition area	SeDg	8
15797	septopallidal transition area	SePal	8
15809	septostriatal transition area (accumbens)	SeStr	8
15819	diagonal domain	Dg	8
15834	pallidum (globus pallidus complex)	Pal	8
15851	striatum (corpus striatum)	Str	8
15868	striatal amygdala	AStr	8
15878	pallidal amygdala	APal	8
15886	diagonal amygdala	ADg	8
15893	hypothalamic amygdala	AHy	8
15905	olfactory bulb, principal part	OB	8
15917	anterior olfactory area, ventral part	AOV	8
15928	ventropallial prepiriform area	VPrP	8
15940	ventropallial amygdalopiriform area	VAP	8
15957	accessory olfactory bulb	AOB	8
15969	anterior olfactory area, dorsal part	AOD	8
15979	lateropallial prepiriform area	LPrP	8
15989	lateropallial amygdalopiriform area	LAP	8
16002	frontal cortex	FCx	8
16016	parietal cortex	PCx	8
16030	occipital cortex	OCx	8
16044	temporal cortex	TCx	8
16058	insular cortex	InsCx	8
16072	cingulate cortex	CCx	8
16086	perirhinal-ectorhinal cortex	PERCx	8
16093	retrosplenial cortex	RSCx	8
16102	entorhinal cortex	ERCx	8
16115	dentate gyrus	DG	8
16124	hippocampus (cortex Ammonis)	CA	8
16147	induseum griseum	IG	8
16154	taenia tecta	TTe	8
16163	subiculum	S	8
16172	presubiculum	PrS	8
16186	parasubiculum	PaS	8
15572	ventricular zone of RSCom	RSComv	9
15574	mantle zone of RSCom	RSComm	9
15579	ventricular zone of LTer	LTerv	9
15580	mantle zone of LTer	LTerm	9
15588	ventricular zone of PO1	PO1v	9
15589	mantle zone of PO1	PO1m	9
15600	ventricular zone of PO2	PO2v	9
15601	mantle zone of PO2	PO2m	9
15614	ventricular zone of POH	POHv	9
15615	mantle zone of POH	POHm	9
15625	ventricular zone of TPaA	TPaAv	9
15626	mantle zone of TPaA	TPaAm	9
15637	ventricular zone of neural retina	ENv	9
15638	mantle zone of neural retina	ENm	9
15654	ventricular zone of TSPaA	TSPaAv	9
15655	mantle zone of TSPaA	TSPaAm	9
15668	ventricular zone of THyB-D	THyB-Dv	9
15669	mantle zone of THyB-D	THyB-Dm	9
15685	ventricular zone of THyB-I	THyB-Iv	9
15686	mantle zone of THyB-I	THyB-Im	9
15703	ventricular zone of THyB-V	THyB-Vv	9
15705	mantle zone of THyB-V	THyB-Vm	9
15713	ventricular zone of THyB-P	THyB-Pv	9
15715	mantle zone of THyB-P	THyB-Pm	9
15724	ventricular zone of Mam	Mamv	9
15725	mantle zone of Mam	Mamm	9
15742	ventricular zone of CSCom	CSComv	9
15744	mantle zone of CSCom	CSComm	9
15754	ventricular zone of DgSe	DgSev	9
15755	mantle zone of DgSe	DgSem	9
15766	ventricular zone of PalSe	PalSev	9
15767	mantle zone of PalSe	PalSem	9
15775	ventricular zone of StrSe	StrSev	9
15776	mantle zone of StrSe	StrSem	9
15786	ventricular zone of SeDg	SeDgv	9
15787	mantle zone of SeDg	SeDgm	9
15798	ventricular zone of SePal	SePalv	9
15799	mantle zone of SePal	SePalm	9
15810	ventricular zone of SeStr	SeStrv	9
15811	mantle zone of SeStr	SeStrm	9
15820	ventricular zone of Dg	Dgv	9
15821	mantle zone of Dg	Dgm	9
15835	ventricular zone of Pal	Palv	9
15836	mantle zone of Pal	Palm	9
15852	ventricular zone of Str	Strv	9
15853	mantle zone of Str	Strm	9
15869	ventricular zone of AStr	AStrv	9
15870	mantle zone of AStr	AStrm	9
15879	ventricular zone of APal	APalv	9
15880	mantle zone of APal	APalm	9
15887	ventricular zone of ADg	ADgv	9
15888	mantle zone of ADg	ADgm	9
15894	ventricular zone of AHy	AHyv	9
15895	mantle zone of AHy	AHym	9
15906	ventricular zone of OB	OBv	9
15907	mantle zone of OB	OBm	9
15918	ventricular zone of AOV	AOVv	9
15919	mantle zone of AOV	AOVm	9
15929	ventricular zone of VPrP	VPrPv	9
15930	mantle zone of VPrP	VPrPm	9
15941	ventricular zone of the VAP	VAPv	9
15942	mantle zone of VAP	VAPm	9
15958	ventricular zone of AOB	AOBv	9
15959	mantle zone of AOB	AOBm	9
15970	ventricular zone of AOD	AODv	9
15971	mantle zone of AOD	AODm	9
15980	ventricular zone of LPrP	LPrPv	9
15981	mantle zone of LPrP	LPrPm	9
15990	ventricular zone of LAP	LAPv	9
15991	mantle zone of LAP	LAPm	9
16003	ventricular zone of FCx	FCv	9
16004	mantle zone of FCx	FCm	9
16017	ventricular zone of PCx	PCv	9
16018	mantle zone of PCx	PCm	9
16031	ventricular zone of OCx	OCv	9
16032	mantle zone of OCx	OCm	9
16045	ventricular zone of TCx	TCv	9
16046	mantle zone of TCx	TCm	9
16059	ventricular zone of InsCx	InsCv	9
16060	mantle zone of InsCx	InsCm	9
16073	ventricular zone of CCx	CCv	9
16074	mantle zone of CCx	CCm	9
16103	ventricular zone of ERCx	ERv	9
16104	mantle zone of ERCx	ERm	9
16116	ventricular zone of DG	DGv	9
16117	mantle zone of DG	DGm	9
16125	ventricular zone of CA	CAv	9
16126	mantle zone of CA	CAm	9
16148	ventricular zone of the IG	IGv	9
16149	mantle zone of the IG	IGm	9
16155	ventricular zone of TTe	TTev	9
16156	mantle zone of TTe	TTem	9
16164	ventricular zone of S	Sv	9
16165	mantle zone of S	Sm	9
16173	ventricular zone of PrS	PrSv	9
16174	mantle zone of PrS	PrSm	9
16187	ventricular zone of PaS	PaSv	9
16188	mantle zone of PaS	PaSm	9
16199	ventricular zone of SePall	SePallv	9
16200	mantle zone of SePall	SePallm	9
16206	ventricular zone of TelH	TelHv	9
16207	mantle zone of TelH	TelHm	9
16214	ventricular zone of PPaA	PPav	9
16215	mantle zone of PPaA	PPam	9
16234	ventricular zone of PSPa	PSPav	9
16235	mantle zone of PSPa	PSPam	9
16249	ventricular zone of PHyB-D	PHyB-Dv	9
16250	mantle zone of PHyB-D	PHyB-Dm	9
16260	ventricular zone of PHyB-I	PHyB-Iv	9
16261	mantle zone of PHyB-I	PHyB-Im	9
16275	ventricular zone of PHyB-V	PHyB-Vv	9
16277	mantle zone of PHyB-V	PHyB-Vm	9
16286	ventricular zone of PHyB-P	PHyB-Pv	9
16287	mantle zone of PHyB-P	PHyB-Pm	9
16296	ventricular zone of RMa	RMav	9
16297	mantle zone of RMa	RMam	9
16316	ventricular zone of PThE	PThEv	9
16317	mantle zone of PThE	PThEm	9
16324	ventricular zone of RtC	RtCv	9
16325	mantle zone of RtC	RtCm	9
16334	ventricular zone of p3ZL	p3ZLv	9
16335	mantle zone of p3ZL	p3ZLm	9
16344	ventricular zone of ZIC	ZICv	9
16345	mantle zone of ZIC	ZICm	9
16354	ventricular zone of p3B	p3Bv	9
16355	mantle zone of p3B	p3Bm	9
16369	ventricular zone of p3F	p3Fv	9
16370	mantle zone of p3F	p3Fm	9
16385	ventricular zone of Hb	Hbv	9
16386	mantle zone of Hb	Hbm	9
16397	ventricular zone of DTTh	DTThv	9
16398	mantle zone of DTTh	DTThm	9
16438	ventricular zone of ITTh	ITThv	9
16439	mantle zone of ITTh	ITThm	9
16454	ventricular zone of VTTh	VTThv	9
16455	mantle zone of VTTh	VTThm	9
16468	ventricular zone of p2ZL	p2ZLv	9
16469	mantle zone of p2ZL	p2ZLm	9
16477	ventricular zone of p2Lim	p2Limv	9
16478	mantle zone of p2Lim	p2Limm	9
16488	ventricular zone of p2B	p2Bv	9
16489	mantle zone of p2B	p2Bm	9
16503	ventricular zone of p2F	p2Fv	9
16504	mantle zone of p2F	p2Fm	9
16513	ventricular zone of PCom	PComv	9
16515	mantle zone of PCom	PComm	9
16522	ventricular zone of PcPD	PcPDv	9
16523	mantle zone of PcPD	PcPDm	9
16531	ventricular zone of PcPL	PcPLv	9
16532	mantle zone of PcPL	PcPLm	9
16540	ventricular zone of PcPV	PcPVv	9
16541	mantle zone of PcPV	PcPVm	9
16550	ventricular zone of JcPD	JcPDv	9
16551	mantle zone of JcPD	JcPDm	9
16560	ventricular zone of JcPL	JcPLv	9
16561	mantle zone of JcPL	JcPLm	9
16570	ventricular zone of JcPV	JcPVv	9
16571	mantle zone of JcPV	JcPVm	9
16580	ventricular zone of CoPD	CoPDv	9
16581	mantle zone of CoPD	CoPDm	9
16592	ventricular zone of CoPL	CoPLv	9
16593	mantle zone of CoPL	CoPLm	9
16603	ventricular zone of CoPV	CoPVv	9
16604	mantle zone of CoPV	CoPVm	9
16614	ventricular zone of p1Lim	p1Limv	9
16615	mantle zone of p1Lim	p1Limm	9
16625	ventricular zone of p1B	p1Bv	9
16626	mantle zone of p1B	p1Bm	9
16642	ventricular zone of p1F	p1Fv	9
16643	mantle zone of p1F	p1Fm	9
16653	ventricular zone of m1R	m1Rv	9
16654	mantle zone of m1R	m1Rm	9
16660	ventricular zone of m1AD	m1ADv	9
16661	mantle zone of m1AD	m1ADm	9
16670	ventricular zone of TG	TGv	9
16671	mantle zone of TG	TGm	9
16679	ventricular zone of SC	SCv	9
16680	mantle zone of SC	SCm	9
16693	ventricular zone of IC	ICv	9
16694	mantle zone of IC	ICm	9
16704	ventricular zone of m1AL	m1ALv	9
16705	mantle zone of m1AL	m1ALm	9
16718	ventricular zone of m1Lim	m1Limv	9
16719	mantle zone of m1Lim	m1Limm	9
16727	ventricular zone of m1B	m1Bv	9
16728	mantle zone of m1B	m1Bm	9
16743	ventricular zone of m1F	m1Fv	9
16744	mantle zone of m1F	m1Fm	9
16756	ventricular zone of m2AD	m2ADv	9
16757	mantle zone of m2AD	m2ADm	9
16763	ventricular zone of m2ADL	m2ADLv	9
16764	mantle zone of m2ADL	m2ADLm	9
16772	ventricular zone of m2AL	m2ALv	9
16773	mantle zone of m2AL	m2ALm	9
16782	ventricular zone of m2Lim	m2Limv	9
16783	mantle zone of m2Lim	m2Limm	9
16792	ventricular zone of m2B	m2Bv	9
16793	mantle zone of m2B	m2Bm	9
16812	ventricular zone of isR	isRv	9
16817	ventricular zone of cerebellar vermis	CbVv	9
16818	mantle zone of cerebellar vermis	CbVm	9
16845	ventricular zone of the PBC	PBv	9
16846	mantle zone of the PBC	PBm	9
16855	ventricular zone of Ist	Istv	9
16856	mantle zone of Ist	Istm	9
16866	ventricular zone of isLim	isLimv	9
16867	mantle zone of isLim	isLimm	9
16878	ventricular zone of isBL	isBLv	9
16879	mantle zone of isBL	isBLm	9
16888	ventricular zone of isBI	isBIv	9
16889	mantle zone of isBI	isBIm	9
16898	ventricular zone of isBM	isBMv	9
16899	mantle zone of isBM	isBMm	9
16912	ventricular zone of isF	isFv	9
16913	mantle zone of isF	isFm	9
16922	ventricular zone of CbH	CbHv	9
16924	mantle zone of CbH	CbHm	9
16951	ventricular zone of r1Ve	r1Vev	9
16952	mantle zone of r1Ve	r1Vem	9
16955	ventricular zone of r1Tr	r1Trv	9
16956	mantle zone of r1Tr	r1Trm	9
16960	ventricular zone of r1Lim	r1Limv	9
16961	mantle zone of r1Lim	r1Limm	9
16969	ventricular zone of r1BL	r1BLv	9
16970	mantle zone of r1BL	r1BLm	9
16985	ventricular zone of r1BI	r1BIv	9
16986	mantle zone of r1BI	r1BIm	9
16995	ventricular zone of r1BM	r1BMv	9
16996	mantle zone of r1BM	r1BMm	9
17027	ventricular zone of r2Co	r2Cov	9
17028	mantle zone of r2Co	r2Com	9
17032	ventricular zone of r2Ve	r2Vev	9
17033	mantle zone of r2Ve	r2Vem	9
17037	ventricular zone of r2Tr	r2Trv	9
17038	mantle zone of r2Tr	r2Trm	9
17043	ventricular zone of r2Lim	r2Limv	9
17044	mantle zone of r2Lim	r2Limm	9
17055	ventricular zone of r2BL	r2BLv	9
17056	mantle zone of r2BL	r2BLm	9
17067	ventricular zone of r2BI	r2BIv	9
17068	mantle zone of r2BI	r2BIm	9
17080	ventricular zone of r2BM	r2BMv	9
17081	mantle zone of r2BM	r2BMm	9
17097	ventricular zone of r3Co	r3Cov	9
17098	mantle zone of r3Co	r3Com	9
17102	ventricular zone of r3Ve	r3Vev	9
17103	mantle zone of r3Ve	r3Vem	9
17108	ventricular zone of r3Tr	r3Trv	9
17109	mantle zone of r3Tr	r3Trm	9
17114	ventricular zone of r3Lim	r3Limv	9
17115	mantle zone of r3Lim	r3Limm	9
17125	ventricular zone of r3BL	r3BLv	9
17126	mantle zone of r3BL	r3BLm	9
17133	ventricular zone of r3BI	r3BIv	9
17134	mantle zone of r3BI	r3BIm	9
17144	ventricular zone of r3BM	r3BMv	9
17145	mantle zone of r3BM	r3BMm	9
17160	ventricular zone of r4Co	r4Cov	9
17161	mantle zone of r4Co	r4Com	9
17165	ventricular zone of r4Ve	r4Vev	9
17166	mantle zone of r4Ve	r4Vem	9
17171	ventricular zone of r4Tr	r4Trv	9
17172	mantle zone of r4Tr	r4Trm	9
17177	ventricular zone of r4Lim	r4Limv	9
17178	mantle zone of r4Lim	r4Limm	9
17184	ventricular zone of r4BL	r4BLv	9
17185	mantle zone of r4BL	r4BLm	9
17197	ventricular zone of r4BI	r4BIv	9
17198	mantle zone of r4BI	r4BIm	9
17208	ventricular zone of r4BM	r4BMv	9
17209	mantle zone of r4BM	r4BMm	9
17225	ventricular zone of r5Co	r5Cov	9
17226	mantle zone of r5Co	r5Com	9
17230	ventricular zone of r5Ve	r5Vev	9
17231	mantle zone of r5Ve	r5Vem	9
17236	ventricular zone of r5Tr	r5Trv	9
17237	mantle zone of r5Tr	r5Trm	9
17243	ventricular zone of r5Lim	r5Limv	9
17244	mantle zone of r5Lim	r5Limm	9
17252	ventricular zone of r5BL	r5BLv	9
17253	mantle zone of r5BL	r5BLm	9
17267	ventricular zone of r5BI	r5BIv	9
17268	mantle zone of r5BI	r5BIm	9
17276	ventricular zone of r5BM	r5BMv	9
17277	mantle zone of r5BM	r5BMm	9
17294	ventricular zone of r6Co	r6Cov	9
17295	mantle zone of r6Co	r6Com	9
17299	ventricular zone of r6Ve	r6Vev	9
17300	mantle zone of r6Ve	r6Vem	9
17305	ventricular zone of r6Tr	r6Trv	9
17306	mantle zone of r6Tr	r6Trm	9
17312	ventricular zone of r6Lim	r6Limv	9
17313	mantle zone of r6Lim	r6Limm	9
17320	ventricular zone of r6BL	r6BLv	9
17321	mantle zone of r6BL	r6BLm	9
17329	ventricular zone of r6BI	r6BIv	9
17330	mantle zone of r6BI	r6BIm	9
17339	ventricular zone of r6BM	r6BMv	9
17340	mantle zone of r6BM	r6BMm	9
17357	ventricular zone of r7Co	r7Cov	9
17358	mantle zone of r7Co	r7Com	9
17362	ventricular zone of r7Ve	r7Vev	9
17363	mantle zone of r7Ve	r7Vem	9
17367	ventricular zone of r7Tr	r7Trv	9
17368	mantle zone of r7Tr	r7Trm	9
17374	ventricular zone of r7Lim	r7Limv	9
17375	mantle zone of r7Lim	r7Limm	9
17382	ventricular zone of r7BL	r7BLv	9
17383	mantle zone of r7BL	r7BLm	9
17391	ventricular zone of r7BI	r7BIv	9
17392	mantle zone of r7BI	r7BIm	9
17401	ventricular zone of r7BM	r7BMv	9
17402	mantle zone of r7BM	r7BMm	9
17420	ventricular zone of r8Ve	r8Vev	9
17421	mantle zone of r8Ve	r8Vem	9
17425	ventricular zone of r8Tr	r8Trv	9
17426	mantle zone of r8Tr	r8Trm	9
17432	ventricular zone of r8Lim	r8Limv	9
17433	mantle zone of r8Lim	r8Limm	9
17439	ventricular zone of r8BL	r8BLv	9
17440	mantle zone of r8BL	r8BLm	9
17450	ventricular zone of r8BI	r8BIv	9
17451	mantle zone of r8BI	r8BIm	9
17461	ventricular zone of r8BM	r8BMv	9
17462	mantle zone of r8BM	r8BMm	9
17480	ventricular zone of r9Ve	r9Vev	9
17481	mantle zone of r9Ve	r9Vem	9
17486	ventricular zone of r9Tr	r9Trv	9
17487	mantle zone of r9Tr	r9Trm	9
17495	ventricular zone of r9Lim	r9Limv	9
17496	mantle zone of r9Lim	r9Limm	9
17502	ventricular zone of r9BL	r9BLv	9
17503	mantle zone of r9BL	r9BLm	9
17513	ventricular zone of r9BI	r9BIv	9
17514	mantle zone of r9BI	r9BIm	9
17524	ventricular zone of r9BM	r9BMv	9
17525	mantle zone of r9BM	r9BMm	9
17542	ventricular zone of r10Ve	r10Vev	9
17543	mantle zone of r10Ve	r10Vem	9
17548	ventricular zone of r10Tr	r10Trv	9
17549	mantle zone of r10Tr	r10Trm	9
17557	ventricular zone of r10Lim	r10Limv	9
17558	mantle zone of r10Lim	r10Limm	9
17564	ventricular zone of r10BL	r10BLv	9
17565	mantle zone of r10BL	r10BLm	9
17572	ventricular zone of r10BI	r10BIv	9
17573	mantle zone of r10BI	r10BIm	9
17582	ventricular zone of r10BM	r10BMv	9
17583	mantle zone of r10BM	r10BMm	9
17600	ventricular zone of r11Ve	r11Vev	9
17601	mantle zone of r11Ve	r11Vem	9
17604	ventricular zone of r11Tr	r11Trv	9
17605	mantle zone of r11Tr	r11Trm	9
17613	ventricular zone of r11Lim	r11Limv	9
17614	mantle zone of r11Lim	r11Limm	9
17622	ventricular zone of r11BL	r11BLv	9
17623	mantle zone of r11BL	r11BLm	9
17630	ventricular zone of r11BI	r11BIv	9
17631	mantle zone of r11BI	r11BIm	9
17639	ventricular zone of r11BM	r11BMv	9
17640	mantle zone of r11BM	r11BMm	9
17655	ventricular zone of the SpAM	SpAMv	9
17656	mantle zone of the SpAM	SpAMm	9
17667	ventricular zone of the SpAL	SpALv	9
17669	mantle zone of the SpAL	SpALm	9
17678	ventricular zone of the SpAV	SpAVv	9
17679	mantle zone of the SpAV	SpAVm	9
17694	ventricular zone of SpBL	SpBLv	9
17695	mantle zone of SpBL	SpBLm	9
17711	ventricular zone of SpBI	SpBIv	9
17712	mantle zone of SpBI	SpBIm	9
17726	ventricular zone of SpBM	SpBMv	9
17727	mantle zone of SpBM	SpBMm	9
15581	periventricular stratum of the LTer	LTerp	10
15583	intermediate stratum of the LTer	LTeri	10
15585	superficial stratum of the LTer	LTers	10
15590	periventricular stratum of PO1	PO1p	10
15593	intermediate stratum of PO1	PO1i	10
15597	superficial stratum of PO1	PO1s	10
15602	periventricular stratum of PO2	PO2p	10
15608	intermediate stratum of PO2	PO2i	10
15610	superficial stratum of PO2	PO2s	10
15616	periventricular stratum of POH	POHp	10
15617	intermediate stratum of POH	POHi	10
15620	superficial stratum of POH	POHs	10
15627	periventricular stratum of TPaA	TPaAp	10
15629	intermediate stratum of TPaA	TPaAi	10
15632	superficial stratum of TPaA	TPaAs	10
15639	periventricular stratum of the retina	ENp	10
15642	intermediate stratum of the retina	ENi	10
15648	superficial stratum of the retina	ENs	10
15656	periventricular stratum of TSPaA	TSPaAp	10
15659	intermediate stratum of TSPaA	TSPaAi	10
15663	superficial stratum of TSPaA	TSPaAs	10
15670	periventricular stratum of THyB-D	THyB-Dp	10
15673	intermediate stratum of THyB-D	THyB-Di	10
15680	superficial stratum of THyB-D	THyB-Ds	10
15687	periventricular stratum of THyB-I	THyB-Ip	10
15693	intermediate stratum of THyB-I	THyB-Ii	10
15699	superficial stratum of THyB-I	THyB-Is	10
15706	periventricular stratum of THyB-V	THyB-Vp	10
15708	intermediate stratum of THyB-V	THyB-Vi	10
15710	superficial stratum of THyB-V	THyB-Vs	10
15716	periventricular stratum of THyB-P	THyB-Pp	10
15718	intermediate stratum of THyB-P	THyB-Pi	10
15720	superficial stratum of THyB-P	THyB-Ps	10
15726	periventricular stratum of Mam	Mamp	10
15728	intermediate stratum of Mam	Mami	10
15733	superficial stratum of Mam	Mams	10
15745	periventricular stratum of CSCom	CSComp	10
15747	intermediate stratum of CSCom	CSComi	10
15748	superficial stratum of CSCom	CSComs	10
15756	periventricular stratum of DgSe	DgSep	10
15759	intermediate stratum of DgSe	DgSei	10
15762	superficial stratum of DgSe	DgSes	10
15768	periventricular stratum of PalSe	PalSep	10
15770	intermediate stratum of PalSe	PalSei	10
15773	superficial stratum of PalSe	PalSes	10
15777	periventricular part of StrSe	StrSep	10
15781	intermediate part of StrSe	StrSei	10
15783	superficial part of StrSe	StrSes	10
15788	periventricular stratum of SeDg	SeDgp	10
15792	intermediate stratum of SeDg	SeDgi	10
15795	superficial stratum of SeDg	SeDgs	10
15800	periventricular stratum of SePal	SePalp	10
15803	intermediate stratum of SePal	SePali	10
15806	superficial stratum of SePal	SePals	10
15812	periventricular stratum of SeStr	SeStrp	10
15814	intermediate stratum of SeStr	SeStri	10
15816	superficial stratum of SeStr	SeStrs	10
15822	periventricular stratum of Dg	Dgp	10
15828	intermediate stratum of Dg	Dgi	10
15831	superficial stratum of Dg	Dgs	10
15837	periventricular stratum of Pal	Palp	10
15842	intermediate stratum of Pal	Pali	10
15845	superficial stratum of Pal	Pals	10
15854	periventricular stratum of Str	Strp	10
15856	intermediate stratum of Str	Stri	10
15861	superficial stratum of Str	Strs	10
15871	periventricular stratum of AStr	AStrp	10
15873	intermediate stratum of AStr	AStri	10
15877	superficial stratum of AStr	AStrs	10
15881	periventricular stratum of APal	APalp	10
15883	intermediate stratum of APal	APali	10
15885	superficial stratum of APal	APals	10
15889	periventricular stratum of ADg	ADgp	10
15891	intermediate stratum of ADg	ADgi	10
15892	superficial stratum of ADg	ADgs	10
15896	periventricular stratum of AHy	AHyp	10
15897	intermediate stratum of AHy	AHyi	10
15898	superficial stratum of AHy	AHys	10
15908	periventricular stratum of OB	OBp	10
15911	intermediate stratum of OB	OBi	10
15914	superficial stratum of OB	OBs	10
15920	periventricular stratum of AOV	AOVp	10
15921	intermediate stratum of AOV	AOVi	10
15922	superficial stratum of AOV	AOVs	10
15931	periventricular stratum of VPrP	VPrPp	10
15932	intermediate stratum of VPrP	VPrPi	10
15936	superficial stratum of VPrP	VPrPs	10
15943	periventricular stratum of the VAP	VAPp	10
15946	intermediate stratum of the VAP	VAPi	10
15949	superficial stratum of the VAP	VAPs	10
15960	periventricular stratum of AOB	AOBp	10
15963	intermediate stratum of AOB	AOBi	10
15966	superficial stratum of AOB	AOBs	10
15972	periventricular stratum of AOD	AODp	10
15973	intermediate stratum of AOD	AODi	10
15974	superficial stratum of AOD	AODs	10
15982	periventricular stratum of LPrP	LPrPp	10
15983	intermediate stratum of LPrP	LPrPi	10
15985	superficial stratum of LPrP	LPrPs	10
15992	periventricular stratum of LAP	LAPp	10
15993	intermediate stratum of LAP	LAPi	10
15997	superficial stratum of LAP	LAPs	10
16005	periventricular stratum of FCx (subventricular zone)	FCp	10
16006	intermediate stratum of FCx (white matter/subplate)	FCi	10
16007	superficial stratum of FCx (cortical plate/marginal zone)	FCs	10
16019	periventricular stratum of PCx (subventricular zone)	PCp	10
16020	intermediate stratum of PCx (white matter/subplate)	PCi	10
16021	superficial stratum of PCx (cortical plate/marginal zone)	PCs	10
16033	periventricular stratum of OCx (subventricular zone)	OCp	10
16034	intermediate stratum of OCx (white matter/subplate)	OCi	10
16035	superficial stratum of OCx (cortical plate/marginal zone)	OCs	10
16047	periventricular stratum of TCx (subventricular zone)	TCp	10
16048	intermediate stratum of TCx (white matter/subplate)	TCi	10
16049	superficial stratum of TCx (cortical plate/marginal zone)	TCs	10
16061	periventricular stratum of InsCx (subventricular zone)	InsCp	10
16062	intermediate stratum of InsCx (white matter/subplate)	InsCi	10
16063	superficial stratum of InsCx (cortical plate/marginal zone)	InsCs	10
16075	periventricular stratum of CCx (subventricular zone)	CCp	10
16076	intermediate stratum of CCx (white matter/subplate)	CCi	10
16077	superficial stratum of CCx (cortical plate/marginal zone)	CCs	10
16105	periventricular stratum of ERCx (subventricular zone)	ERp	10
16106	intermediate stratum of ERCx (white matter/subplate)	ERi	10
16107	superficial stratum of ERCx (cortical plate/marginal zone)	ERs	10
16118	periventricular stratum of DG	DGp	10
16119	intermediate stratum of DG	DGi	10
16121	superficial stratum of DG	DGs	10
16127	periventricular stratum of CA	CAp	10
16128	intermediate stratum of CA	CAi	10
16130	superficial stratum of CA	CAs	10
16150	periventricular stratum of the IG	IGp	10
16151	intermediate stratum of the IG	IGi	10
16152	superficial stratum of the IG	IGs	10
16157	periventricular stratum of TTe	TTep	10
16159	intermediate stratum of TTe	TTei	10
16161	superficial stratum of TTe	TTes	10
16166	periventricular stratum of S	Sp	10
16167	intermediate stratum of S	Si	10
16169	superficial stratum of S	Ss	10
16175	periventricular stratum of PrS (subventricular zone)	PrSp	10
16176	intermediate stratum of PrS (white matter/subplate)	PrSi	10
16177	superficial stratum of PrS (cortical plate/marginal zone)	PrSs	10
16189	periventricular stratum of PaS (subventricular zone)	PaSp	10
16190	intermediate stratum of PaS (white matter/subplate)	PaSi	10
16191	superficial stratum of PaS (cortical plate/marginal zone)	PaSs	10
16201	periventricular stratum of SePall	SePallp	10
16202	intermediate stratum of SePall	SePalli	10
16203	superficial stratum of SePall	SePalls	10
16208	periventricular stratum of TelH	TelHp	10
16209	intermediate stratum of TelH	TelHi	10
16210	superficial stratum of TelH	TelHs	10
16216	periventricular stratum of PPaA	PPap	10
16225	intermediate stratum of PPaA	PPai	10
16231	superficial stratum of PPaA	PPas	10
16236	periventricular stratum of PSPa	PSPap	10
16239	intermediate stratum of PSPa	PSPai	10
16244	superficial stratum of PSPa	PSPas	10
16251	periventricular stratum of PHyB-D	PHyB-Dp	10
16253	intermediate stratum of PHyB-D	PHyB-Di	10
16257	superficial stratum of PHyB-D	PHyB-Ds	10
16262	periventricular stratum of PHyB-I	PHyB-Ip	10
16264	intermediate stratum of PHyB-I	PHyB-Ii	10
16270	superficial stratum of PHyB-I	PHyB-Is	10
16278	periventricular stratum of PHyB-V	PHyB-Vp	10
16280	intermediate stratum of PHyB-V	PHyB-Vi	10
16282	superficial stratum of PHyB-V	PHyB-Vs	10
16288	periventricular stratum of PHyB-P	PHyB-Pp	10
16290	intermediate stratum of PHyB-P	PHyB-Pi	10
16292	superficial stratum of PHyB-P	PHyB-Ps	10
16298	periventricular stratum of RMa	RMap	10
16301	intermediate stratum of RMa	RMai	10
16303	superficial stratum of RMa	RMas	10
16318	periventricular stratum of PThE	PThEp	10
16319	intermediate stratum of PThE	PThEi	10
16321	superficial stratum of PThE	PThEs	10
16326	periventricular stratum of RtC	RtCp	10
16328	intermediate stratum of RtC	RtCi	10
16330	superficial stratum of RtC	RtCs	10
16336	periventricular stratum of p3ZL	p3ZLp	10
16338	intermediate stratum of p3ZL	p3ZLi	10
16340	superficial stratum of p3ZL	p3ZLs	10
16346	periventricular stratum of ZIC	ZICp	10
16348	intermediate stratum of ZIC	ZICi	10
16350	superficial stratum of ZIC	ZICs	10
16356	periventricular stratum of p3B	p3Bp	10
16358	intermediate stratum of p3B	p3Bi	10
16364	superficial stratum of p3B	p3Bs	10
16371	periventricular stratum of p3F	p3Fp	10
16372	intermediate stratum of p3F	p3Fi	10
16373	superficial stratum of p3F	p3Fs	10
16387	periventricular stratum of Hb	Hbp	10
16390	intermediate stratum of Hb	Hbi	10
16393	superficial stratum of Hb	Hbs	10
16399	periventricular stratum of DTTh	DTThp	10
16409	intermediate stratum of DTTh	DTThi	10
16433	superficial stratum of DTTh	DTThs	10
16440	periventricular stratum of ITTh	ITThp	10
16443	intermediate stratum of ITTh	ITThi	10
16450	superficial stratum of ITTh	ITThs	10
16456	periventricular stratum of VTTh	VTThp	10
16458	intermediate stratum of VTTh	VTThi	10
16461	superficial stratum of VTTh	VTThs	10
16470	periventricular stratum of p2ZL	p2ZLp	10
16472	intermediate stratum of p2ZL	p2ZLi	10
16474	superficial stratum of p2ZL	p2ZLs	10
16479	periventricular stratum of p2Lim	p2Limp	10
16481	intermediate stratum of p2Lim	p2Limi	10
16483	superficial stratum of p2Lim	p2Lims	10
16490	periventricular stratum of p2B	p2Bp	10
16492	intermediate stratum of p2B	p2Bi	10
16497	superficial stratum of p2B	p2Bs	10
16505	periventricular stratum of p2F	p2Fp	10
16506	intermediate stratum of p2F	p2Fi	10
16507	superficial stratum of p2F	p2Fs	10
16516	periventricular zone of PCom	PComp	10
16517	intermediate zone of PCom	PComi	10
16518	superficial zone of PCom	PComs	10
16524	periventricular stratum of PcPD	PcPDp	10
16526	intermediate stratum of PcPD	PcPDi	10
16528	superficial stratum of PCPD	PcPDs	10
16533	periventricular stratum of PcPL	PcPLp	10
16535	intermediate stratum of PcPL	PcPLi	10
16537	superficial stratum of PcPL	PcPLs	10
16542	periventricular stratum of PcPV	PcPVp	10
16544	intermediate stratum of PcPV	PcPVi	10
16546	superficial stratum of PcPV	PcPVs	10
16552	periventricular stratum of JcPD	JcPDp	10
16554	intermediate stratum of JcPD	JcPDi	10
16557	superficial stratum of JcPD	JcPDs	10
16562	periventricular stratum of JcPL	JcPLp	10
16564	intermediate stratum of JcPL	JcPLi	10
16567	superficial stratum of JcPL	JcPLs	10
16572	periventricular stratum of JcPV	JcPVp	10
16574	intermediate stratum of JcPV	JcPVi	10
16576	superficial stratum of JcPV	JcPVs	10
16582	periventricular stratum of CoPD	CoPDp	10
16584	intermediate stratum of CoPD	CoPDi	10
16588	superficial stratum of CoPD	CoPDs	10
16594	periventricular stratum of CoPL	CoPLp	10
16596	intermediate stratum of CoPL	CoPLi	10
16600	superficial stratum of CoPL	CoPLs	10
16605	periventricular stratum of CoPV	CoPVp	10
16607	intermediate stratum of CoPV	CoPVi	10
16610	superficial stratum of CoPV	CoPVs	10
16616	periventricular stratum of p1Lim	p1Limp	10
16618	intermediate stratum of p1Lim	p1Limi	10
16621	superficial stratum of p1Lim	p1Lims	10
16627	periventricular stratum of p1B	p1Bp	10
16631	intermediate stratum of p1B	p1Bi	10
16636	superficial stratum of p1B	p1Bs	10
16644	periventricular stratum of p1F	p1Fp	10
16646	intermediate stratum of p1F	p1Fi	10
16647	superficial stratum of p1F	p1Fs	10
16662	periventricular stratum of m1AD	m1ADp	10
16664	intermediate stratum of m1AD	m1ADi	10
16666	superficial stratum of m1AD	m1ADs	10
16672	periventricular stratum of TG	TGp	10
16674	intermediate stratum of TG	TGi	10
16676	superficial stratum of TG	TGs	10
16681	periventricular stratum of SC	SCp	10
16684	intermediate stratum of SC	SCi	10
16688	superficial stratum of SC	SCs	10
16695	periventricular stratum of IC	ICp	10
16697	intermediate stratum of IC	ICi	10
16699	superficial stratum of IC	ICs	10
16706	periventricular stratum of m1AL	m1ALp	10
16710	intermediate stratum of m1AL	m1ALi	10
16713	superficial stratum of m1AL	m1ALs	10
16720	periventricular stratum of m1Lim	m1Limp	10
16722	intermediate stratum of m1Lim	m1Limi	10
16724	superficial stratum of m1Lim	m1Lims	10
16729	periventricular stratum of m1B	m1Bp	10
16732	intermediate stratum of m1B	m1Bi	10
16738	superficial stratum of m1B	m1Bs	10
16745	periventricular stratum of m1F	m1Fp	10
16747	intermediate stratum of m1F	m1Fi	10
16749	superficial stratum of m1F	m1Fs	10
16758	periventricular stratum of m2AD	m2ADp	10
16760	intermediate stratum of m2AD	m2ADi	10
16761	superficial stratum of m2AD	m2ADs	10
16765	periventricular stratum of m2ADL	m2ADLp	10
16767	intermediate stratum of m2ADL	m2ADLi	10
16769	superficial stratum of m2ADL	m2ADLs	10
16774	periventricular stratum of m2AL	m2ALp	10
16776	intermediate stratum of m2AL	m2ALi	10
16778	superficial stratum of m2AL	m2ALs	10
16784	periventricular stratum of m2Lim	m2Limp	10
16786	intermediate stratum of m2Lim	m2Limi	10
16789	superficial stratum of m2Lim	m2Lims	10
16794	periventricular stratum of m2B	m2Bp	10
16797	intermediate stratum of m2B	m2Bi	10
16800	superficial stratum of m2B	m2Bs	10
16819	periventricular stratum of cerebellar vermis	CbVp	10
16821	intermediate stratum of cerebellar vermis	CbVi	10
16828	superficial stratum of cerebellar vermis	CbVs	10
16847	periventricular stratum of the PBC	PBp	10
16849	intermediate stratum of the PBC	PBi	10
16851	superficial stratum of the PBC	PBs	10
16857	periventricular stratum of Ist	Istp	10
16859	intermediate stratum of Ist	Isti	10
16861	superficial stratum of Ist	Ists	10
16868	periventricular stratum of isLim	isLimp	10
16871	intermediate stratum of isLim	isLimi	10
16874	superficial stratum of isLim	isLims	10
16880	periventricular stratum of isBL	isBLp	10
16882	intermediate stratum of isBL	isBLi	10
16885	superficial stratum of isBL	isBLs	10
16890	periventricular stratum of isBI	isBIp	10
16893	intermediate stratum of isBI	isBIi	10
16895	superficial stratum of isBI	isBIs	10
16900	periventricular mantle of isBM	isBMp	10
16902	intermediate mantle of isBM	isBMi	10
16907	superficial mantle of isBM	isBMs	10
16925	periventricular stratum of CbH	CbHp	10
16927	intermediate stratum of CbH	CbHi	10
16938	superficial stratum of cerebellar hemisphere	CbHs	10
16971	periventricular stratum of r1BL	r1BLp	10
16975	intermediate stratum of r1BL	r1BLi	10
16981	superficial stratum of r1BL	r1BLs	10
16987	periventricular stratum of r1BI	r1BIp	10
16990	intermediate stratum of r1BI	r1BIi	10
16993	superficial stratum of r1BI	r1BIs	10
16997	periventricular stratum of r1BM	r1BMp	10
17004	intermediate stratum of r1BM	r1BMi	10
17013	superficial stratum of r1BM	r1BMs	10
17057	periventricular stratum of r2BL	r2BLp	10
17058	intermediate stratum of r2BL	r2BLi	10
17063	superficial stratum of r2BL	r2BLs	10
17069	periventricular stratum of r2BI	r2BIp	10
17074	intermediate stratum of r2BI	r2BIi	10
17078	superficial stratum of r2BI	r2BIs	10
17082	periventricular stratum of r2BM	r2BMp	10
17085	intermediate stratum of r2BM	r2BMi	10
17089	superficial stratum of r2BM	r2BMs	10
17127	periventricular stratum of r3BL	r3BLp	10
17129	intermediate stratum of r3BL	r3BLi	10
17131	superficial stratum of r3BL	r3BLs	10
17135	periventricular stratum of r3BI	r3BIp	10
17139	intermediate stratum of r3BI	r3BIi	10
17141	superficial stratum of r3BI	r3BIs	10
17146	periventricular stratum of r3BM	r3BMp	10
17148	intermediate stratum of r3BM	r3BMi	10
17153	superficial stratum of r3BM	r3BMs	10
17186	periventricular stratum of r4BL	r4BLp	10
17188	intermediate stratum of r4BL	r4BLi	10
17192	superficial stratum of r4BL	r4BLs	10
17199	periventricular stratum of r4BI	r4BIp	10
17203	intermediate stratum of r4BI	r4BIi	10
17205	superficial stratum of r4BI	r4BIs	10
17210	periventricular stratum of r4BM	r4BMp	10
17212	intermediate stratum of r4BM	r4BMi	10
17217	superficial stratum of r4BM	r4BMs	10
17254	periventricular stratum of r5BL	r5BLp	10
17256	intermediate stratum of 5BL	r5BLi	10
17258	superficial stratum of r5BL	r5BLs	10
17269	periventricular stratum of r5BI	r5BIp	10
17271	intermediate stratum of r5BI	r5BIi	10
17273	superficial stratum of r5BI	r5BIs	10
17278	periventricular stratum of r5BM	r5BMp	10
17280	intermediate stratum of r5BM	r5BMi	10
17286	superficial stratum of r5BM	r5BMs	10
17322	periventricular stratum of r6BL	r6BLp	10
17324	intermediate stratum of r6BL	r6BLi	10
17326	superficial stratum of r6BL	r6BLs	10
17331	periventricular stratum of r6BI	r6BIp	10
17333	intermediate stratum of r6BI	r6BIi	10
17335	superficial stratum of r6BI	r6BIs	10
17341	periventricular stratum of r6BM	r6BMp	10
17343	intermediate stratum of r6BM	r6BMi	10
17348	superficial stratum of r6BM	r6BMs	10
17384	periventricular stratum of r7BL	r7BLp	10
17386	intermediate stratum of r7BL	r7BLi	10
17388	superficial stratum of r7BL	r7BLs	10
17393	periventricular stratum of r7BI	r7BIp	10
17395	intermediate stratum of r7BI	r7BIi	10
17397	superficial stratum of r7BI	r7BIs	10
17403	periventricular stratum of r7BM	r7BMp	10
17407	intermediate stratum of r7BM	r7BMi	10
17412	superficial stratum of r7BM	r7BMs	10
17441	periventricular stratum of r8BL	r8BLp	10
17443	intermediate stratum of r8BL	r8BLi	10
17445	superficial stratum of r8BL	r8BLs	10
17452	periventricular stratum of r8BI	r8BIp	10
17455	intermediate stratum of r8BI	r8BIi	10
17457	superficial stratum of r8BI	r8BIs	10
17463	periventricular stratum of r8BM	r8BMp	10
17467	intermediate stratum of r8BM	r8BMi	10
17472	superficial stratum of r8BM	r8BMs	10
17504	periventricular stratum of r9BL	r9BLp	10
17506	intermediate stratum of r9BL	r9BLi	10
17508	superficial stratum of r9BL	r9BLs	10
17515	periventricular stratum of r9BI	r9BIp	10
17518	intermediate stratum of r9BI	r9BIi	10
17520	superficial stratum of r9BI	r9BIs	10
17526	periventricular stratum of r9BM	r9BMp	10
17529	intermediate stratum of r9BM	r9BMi	10
17534	superficial stratum of r9BM	r9BMs	10
17566	periventricular stratum of r10BL	r10BLp	10
17568	intermediate stratum of r10BL	r10BLi	10
17570	superficial stratum of r10BL	r10BLs	10
17574	periventricular stratum of r10BI	r10BIp	10
17577	intermediate stratum of r10BI	r10BIi	10
17580	superficial stratum of r10BI	r10BIs	10
17584	periventricular stratum of r10BM	r10BMp	10
17587	intermediate stratum of r10BM	r10BMi	10
17592	superficial stratum of r10BM	r10BMs	10
17624	periventricular stratum of r11BL	r11BLp	10
17626	intermediate stratum of r11BL	r11BLi	10
17628	superficial stratum of r11BL	r11BLs	10
17632	periventricular stratum of r11BI	r11BIp	10
17635	intermediate stratum of r11BI	r11BIi	10
17637	superficial stratum of r11BI	r11BIs	10
17641	periventricular stratum of r11BM	r11BMp	10
17643	intermediate stratum of r11BM	r11BMi	10
17648	superficial stratum of r11BM	r11BMs	10
17657	periventricular stratum of the SpAM	SpAMp	10
17659	intermediate stratum of the SpAM	SpAMi	10
17665	superficial stratum of the SpAM	SpAMs	10
17670	periventricular stratum of the SpAL	SpALp	10
17671	intermediate stratum of the SpAL	SpALi	10
17674	superficial stratum of the SpAL	SpALs	10
17680	periventricular stratum of the SpAV	SpAVp	10
17682	intermediate stratum of the SpAV	SpAVi	10
17689	superficial stratum of the SpAV	SpAVs	10
17696	periventricular stratum of SpBL	SpBLp	10
17698	intermediate stratum of SpBL	SpBLi	10
17709	superficial stratum of SpBL	SpBLs	10
17713	periventricular stratum of SpBI	SpBIp	10
17715	intermediate stratum of SpBI	SpBIi	10
17724	superficial stratum of SpBI	SpBIs	10
17728	periventricular stratum of SpBM	SpBMp	10
17730	intermediate stratum of SpBM	SpBMi	10
17733	superficial stratum of SpBM	SpBMs	10
15573	anterior commissure bed	ACBed	11
15575	median preoptic nucleus, commissural part	MnPOC	11
15582	vascular organ of the lamina terminalis	VOLT	11
15584	median preoptic nucleus, intermediate part	MnPOI	11
15586	median preoptic nucleus, superficial part	MnPOS	11
15591	anteroventral periventricular preoptic nucleus	AVPe	11
15592	dorsal septopreoptic nucleus	DSPO	11
15594	parastrial preoptic nucleus	PS	11
15595	dorsomedial preoptic area, intermediate part	DMPAi	11
15596	lateral preoptic area, PO1 part	LPO1	11
15598	dorsomedial preoptic area, superficial part	DMPAs	11
15603	medial preoptic periventricular stratum	MPOPe	11
15604	medial preoptic nucleus	MPO	11
15609	lateral preoptic nucleus, PO2 part	LPO2	11
15611	ventromedial preoptic nucleus	VMPO	11
15612	ventrolateral preoptic nucleus	VLPO	11
15618	striohypothalamic nucleus	StHy	11
15619	preopto-hypothalamic area	POHA	11
15621	episupraoptic nucleus	ESO	11
15628	rostral paraventricular nucleus	RPa	11
15630	lateral anterior hypothalamic nucleus	LA	11
15631	terminal nucleus of the stria medullaris	TSM	11
15633	supraoptic nucleus	SO	11
15640	outer nuclear layer (photoreceptor layer)	ON	11
15641	outer plexiform layer	OPL	11
15643	horizontal cell layer	Hor	11
15644	bipolar cell layer	Bi	11
15645	Mueller cell layer	Mu	11
15646	amacrine cell layer	Acr	11
15647	inner plexiform layer	IPL	11
15649	ganglion cell layer	GCL	11
15652	optic fiber layer	OF	11
15657	suprachiasmatic nucleus, periventricular part	SCHp	11
15658	terminal subparaventricular area	TSPa	11
15660	suprachiasmatic nucleus	SCH	11
15662	anterior hypothalamic nucleus	AH	11
15665	tuber cinereum area	TC	11
15671	periventricular part of the anterobasal nucleus	ABasp	11
15672	periventricular domain associated to VMH	VMHp	11
15674	core part of the anterobasal nucleus	ABasc	11
15675	ventromedial hypothalamic nucleus	VMH	11
15681	shell part of the anterobasal nucleus	ABass	11
15682	suboptic nucleus	SbO	11
15683	tuberal nucleus	Tu	11
15688	periventricular part of the arcuate nucleus	Arcp	11
15689	median eminence	ME	11
15690	infundibulum	Inf	11
15691	neurohypophysis	NHy	11
15692	periventricular domain associated to T-DMH	T-DMHp	11
15694	dorsomedial nucleus, terminal part	T-DMH	11
15697	intermediate part of the arcuate nucleus	Arci	11
15698	ventral premammillary nucleus (migrated)	PMV	11
15700	superficial part of arcuate nucleus	Arcs	11
15701	medial tuberal nucleus	MTu	11
15704	hypothalamic ventricular organ, terminal part	T-HVO	11
15707	ventral tuberomammillary nucleus, pervientricular part (histaminergic)	VTMp	11
15709	ventral tuberomammillary nucleus, intermediate part (histaminergic)	VTMi	11
15711	ventral tuberomammillary nucleus, superficial part (histaminergic)	VTMs	11
15714	mammillary recess organ	MRO	11
15717	periventricular perimammillary area	PPeM	11
15719	dorsal premammillary nucleus	PMD	11
15721	terete nucleus	Te	11
15727	median mammillary nucleus	MnM	11
15729	medial mammillary nucleus	MM	11
15734	lateral mammillary nucleus	LM	11
15735	ventral tuberomammillary nucleus, migrated part (histaminergic)	VTMm	11
15743	subfornical organ, circumventricular ependymal specialization	SFOe	11
15746	subfornical organ, periventricular part	SFOp	11
15757	lateral septal nucleus, ventral part	LSV	11
15758	median supracommissural nucleus	MnSC	11
15760	lateral septal nucleus, intermedio-ventral part	LSIV	11
15761	septohypothalamic nucleus	SHy	11
15763	vertical nucleus of the diagonal band	VDB	11
15764	medial septal nucleus	MS	11
15769	lateral septal nucleus, intermediate part, periventricular	LSIp	11
15771	lateral septal nucleus, intermedio-intermediate part	LSII	11
15772	lambdoid septal zone	Ld	11
15778	lateral septal nucleus, dorsal part	LSD	11
15779	triangular septal nucleus	TS	11
15780	septofimbrial nucleus	SFi	11
15782	lateral septal nucleus, intermedio-dorsal part	LSID	11
15789	bed nucleus of the stria terminalis, medioseptal division	BSTMS	11
15793	substantia innominata/basal nucleus, transitional part	SIBT	11
15794	bed nucleus of the anterior commissure	BAC	11
15796	horizontal nucleus of the diagonal band, transitional part	HDBT	11
15801	bed nucleus of the stria terminalis, lateroseptal division	BSTLS	11
15804	septopallidal core nucleus	SePalCo	11
15805	septopallidal shell area	SePalSh	11
15807	septopallidal part of the olfactory tuberculum	TuSePal	11
15808	island of Calleja major	ICjM	11
15813	accumbens nucleus, core domain	AcbCo	11
15815	accumbens nucleus, shell domain	AcbSh	11
15817	septostriatal part of the olfactory tuberculum	TuSeStr	11
15823	bed nucleus of the stria terminalis, mediocentral division	BSTMC	11
15827	extended amygdala, diagonal part	EADg	11
15829	substantia innominata/basal nucleus	SIB	11
15830	internal globus pallidus	IPal	11
15832	horizontal nucleus of the diagonal band	HDB	11
15833	magnocellular diagonal band nucleus	MCDB	11
15838	bed nucleus of the stria terminalis, laterocentral division	BSTLC	11
15843	external globus pallidum	EPal	11
15844	ventral pallidum	VPal	11
15846	pallidal part of olfactory tuberculum	TuPal	11
15850	pallidal islands of Calleja	ICjPal	11
15855	caudate nucleus	Cau	11
15857	putamen	Put	11
15858	ventral striatum	VStr	11
15859	interstitial nucleus of the posterior limb of the anterior commissure	IPAC	11
15860	laterostriatal stripe	LSS	11
15862	striatal part of olfactory tuberculum	TuStr	11
15866	striatal islands of Calleja	ICjStr	11
15872	amygdalo-striatal transition	ASt	11
15874	central amygdalar nucleus, lateral part	CeL	11
15875	central amygdalar nucleus, capsular part	CeC	11
15876	intercalated amygdaloid nuclei	IA	11
15882	bed nucleus of stria terminalis, lateral amygdaloid division	BSTLA	11
15884	central amygdaloid nucleus, medial part	CeM	11
15890	bed nucleus of the stria terminalis, medial amygdaloid division	BSTMA	11
15899	medial amygdala, posterodorsal part	MePD	11
15900	medial amygdala, posteroventral part	MePV	11
15901	medial amygdala, anterodorsal part	MeAD	11
15902	medial amygdala, anteroventral part	MeAV	11
15909	OB granular layer	OB-Gr	11
15910	OB inner plexiform layer	OB-Ipl	11
15912	OB mitral cell layer	OB-Mtr	11
15913	OB outer plexiform layer	OB-Opl	11
15915	OB glomerular layer	OB-Glom	11
15916	OB olfactory fiber layer	OB-OF	11
15923	layer 1 of AOV cortex	AOV1	11
15924	layer 2 of AOV cortex	AOV2	11
15925	layer 3 of AOV cortex	AOV3	11
15926	external part of AOV	AOVE	11
15927	navicular nucleus	Nv	11
15933	bed nucleus of the external capsule	BEC	11
15934	dorsal endopiriform nucleus	DEn	11
15935	ventral endopiriform nucleus	VEn	11
15937	layer 1 of VPrP cortex	VPrP1	11
15938	layer 2 of VPrP cortex	VPrP2	11
15939	layer 3 of VPrP cortex	VPrP3	11
15944	lateral amygdaloid nucleus	La	11
15945	amygdalohippocampal area	AHi	11
15947	basomedial amygdaloid nucleus, anterior part	BMA	11
15948	basomedial amygdaloid nucleus, posterior part	BMP	11
15950	posteromedial cortical amygdaloid area	PMCo	11
15951	nucleus of the lateral olfactory tract	LOT	11
15955	nucleus of the accessory olfactory tract	NAOT	11
15961	AOB, granular layer	AGr	11
15962	AOB, internal plexiform layer	AIPl	11
15964	AOB, mitral cell layer	AMtr	11
15965	AOB, outer plexiform layer	AOPl	11
15967	AOB, glomerular layer	AGlom	11
15968	AOB, fiber layer	AOF	11
15975	layer 1 of AOD cortex	AOD1	11
15976	layer 2 of AOD cortex	AOD2	11
15977	layer 3 of AOD cortex	AOD3	11
15978	external part of AOD	AODE	11
15984	claustrum	Cl	11
15986	layer 1 of LPrP cortex	LPrP1	11
15987	layer 2 of LPrP cortex	LPrP2	11
15988	layer 3 of LPrP cortex	LPrP3	11
15994	basolateral amygdaloid nucleus, anterior part	BLA	11
15995	basolateral amygdaloid nucleus, posterior part	BLP	11
15996	basolateral amygdaloid nucleus, ventral part	BLV	11
15998	amygdalopiriform area	APir	11
15999	posterolateral cortical amygdaloid area	PLCo	11
16000	anterior cortical amygdaloid area	ACo	11
16008	layer 1 of FCx	FC-1	11
16009	layer 2 of FCx	FC-2	11
16010	layer 3 of FCx	FC-3	11
16011	layer 4 of FCx	FC-4	11
16012	layer 5 of FCx	FC-5	11
16013	layer 6 of FCx	FC-6	11
16022	layer 1 of PCx	PC-1	11
16023	layer 2 of PCx	PC-2	11
16024	layer 3 of PCx	PC-3	11
16025	layer 4 of PCx	PC-4	11
16026	layer 5 of PCx	PC-5	11
16027	layer 6 of PCx	PC-6	11
16036	layer 1 of OCx	OC-1	11
16037	layer 2 of OCx	OC-2	11
16038	layer 3 of OCx	OC-3	11
16039	layer 4 of OCx	OC-4	11
16040	layer 5 of OCx	OC-5	11
16041	layer 6 of OCx	OC-6	11
16050	layer 1 of TCx	TC-1	11
16051	layer 2 of TCx	TC-2	11
16052	layer 3 of TCx	TC-3	11
16053	layer 4 of TCx	TC-4	11
16054	layer 5 of TCx	TC-5	11
16055	layer 6 of TCx	TC-6	11
16064	layer 1 of InsCx	InsC-1	11
16065	layer 2 of InsCx	InsC-2	11
16066	layer 3 of InsCx	InsC-3	11
16067	layer 4 of InsCx	InsC-4	11
16068	layer 5 of InsCx	InsC-5	11
16069	layer 6 of InsCx	InsC-6	11
16078	layer 1 of CCx	CC-1	11
16079	layer 2 of CCx	CC-2	11
16080	layer 3 of CCx	CC-3	11
16081	layer 4 of CCx	CC-4	11
16082	layer 5 of CCx	CC-5	11
16083	layer 6 of CCx	CC-6	11
16087	layer 1 of PRh-Ect	PRh-Ect-1	11
16088	layer 2 of PRh-Ect	PRh-Ect-2	11
16089	layer 3 of PRh-Ect	PRh-Ect-3	11
16090	layer 4 of PRh-Ect	PRh-Ect-4	11
16091	layer 5 of PRh-Ect	PRh-Ect-5	11
16092	layer 6 of PRh-Ect	PRh-Ect-6	11
16094	layer 1 of RSC	RSC-1	11
16095	layer 2 of RSC	RSC-2	11
16096	layer 3 of RSC	RSC-3	11
16097	layer 4 of RSC	RSC-4	11
16098	layer 5 of RSC	RSC-5	11
16099	layer 6 of RSC	RSC-6	11
16108	layer 1 of ERCx	ER-1	11
16109	layer 2 of ERCx	ER-2	11
16110	layer 3 of ERCx	ER-3	11
16111	layer 4 of ERCx	ER-4	11
16112	layer 5 of ERCx	ER-5	11
16113	layer 6 of ERCx	ER-6	11
16120	hilus of the DG	DGHil	11
16122	granule cell layer of the DG	DGGran	11
16123	molecular layer of the DG	DGMol	11
16131	Field CA1	CA1	11
16136	Field CA2	CA2	11
16141	Field CA3	CA3	11
16153	pyramidal layer of IG	PyIG	11
16158	dorsal peduncular cortex, periventricular part	DPp	11
16160	dorsal peduncular cortex, intermediate part	DPi	11
16162	pyramidal layer of taenia tecta	PyTT	11
16170	pyramidal layer of S	PyS	11
16171	molecular layer of S	SMol	11
16178	layer 1 of PrS	PrS-1	11
16179	layer 2 of PrS	PrS-2	11
16180	layer 3 of PrS	PrS-3	11
16181	layer 4 of PrS (lamina dissecans)	PrS-4	11
16182	layer 5 of PrS	PrS-5	11
16183	layer 6 of PrS	PrS-6	11
16192	layer 1 of PaS	PaS-1	11
16193	layer 2 of PaS	PaS-2	11
16194	layer 3 of PaS	PaS-3	11
16195	layer 4 of PaS	PaS-4	11
16196	layer 5 of PaS	PaS-5	11
16197	layer 6 of PaS	PaS-6	11
16204	septohippocampal nucleus	SHi	11
16217	paraventricular nucleus, peduncular or principal part	PPa	11
16226	paraventricular nucleus, lateral part	PaL	11
16227	upper dorsal perifornical nucleus	UDPeF	11
16228	upper dorsal lateral hypothalamic area	UDLH	11
16229	lateral posterior nucleus	LPo	11
16230	peduncular nucleus of the stria medullaris	PSM	11
16232	dorsal entopeduncular nucleus	EPD	11
16237	posterior anterior hypothalamic area, periventricular part	AHPp	11
16238	A13 dopaminergic cell group	A13	11
16240	posterior part of anterior hypothalamic nucleus	AHP	11
16242	lower dorsal perifornical nucleus	LDPeF	11
16243	lower dorsal lateral hypothalamic area	LDLH	11
16245	ventral entopeduncular nucleus	EPV	11
16246	dorsoventral lateral hypothalamic area	DVLH	11
16252	posterobasal nucleus, periventricular part	PBasp	11
16254	posterobasal nucleus, intermediate part	PBasi	11
16255	upper basal lateral hypothalamic area	UBLH	11
16256	upper basal perifornical nucleus	UBPeF	11
16258	magnocellular superficial hypothalamic nucleus	MCSH	11
16263	periventricular domain associated to P-DMH	P-DMHp	11
16265	peduncular part of dorsomedial hypothalamic nucleus	P-DMH	11
16268	lower basal lateral hypothalamic area	LBLH	11
16269	lower basal perifornical nucleus	LBPeF	11
16271	lateral tuberal nucleus	LTu	11
16272	subthalamic nucleus (migrated)	STh	11
16273	parasubthalamic nucleus (migrated)	PSTh	11
16276	hypothalamic ventricular organ, peduncular part	P-HVO	11
16279	dorsal tuberomammillary nucleus, periventricular part (histaminergic)	DTMp	11
16281	dorsal tuberomammillary nucleus, intermediate part (histaminergic)	DTMi	11
16283	paraterete nucleus	PTe	11
16284	caudal tuberomammillary nucleus (histaminergic)	CTM	11
16289	periventricular periretromammillary nucleus	PPRM	11
16291	intermediate periretromammillary nucleus	IPRM	11
16293	lateral periretromammillary nucleus	LPRM	11
16299	retromammillary area, medial part	RMM	11
16300	submammillothalamic nucleus	SMT	11
16302	retromammillary area, lateral part	RML	11
16304	subthalamic nucleus (migratory origin)	SThO	11
16305	parasubthalamic nucleus (migratory origin)	PSThO	11
16320	nucleus of the stria medullaris (prethalamic)	SM	11
16327	retrohypothalamic nucleus	RHy	11
16329	reticular nucleus	Rt	11
16331	subgeniculate nucleus	SubG	11
16337	shell of p3ZL	p3ZLS	11
16339	intercalate nucleus	IntC	11
16341	pregeniculate nucleus	PreG	11
16342	peripeduncular nucleus	PP	11
16347	magnocellular (periventricular) zona incerta	ZIM	11
16349	rostral zona incerta	RZI	11
16351	accessory entopeduncular nucleus (post-migratory)	EPAc	11
16357	p3 portion of the pre-Edinger-Westphal nucleus	p3PEW	11
16359	p3 part of the ZL core	p3ZLC	11
16360	caudal zona incerta	CZI	11
16361	tegmental field of p3 (Forel's field)	p3Tg	11
16362	gemini nuclei	Gem	11
16363	p3 portion of parabrachial pigmented nucleus	p3PBP	11
16365	p3 portion of the substantia nigra pars compacta	p3SNC	11
16366	p3 portion of the substantia nigra pars reticulata	p3SNR	11
16367	p3 portion of paranigral nucleus	p3PN	11
16374	p3 portion of the ventral tegmental area	p3VTA	11
16379	bed of the habenular commissure	BHbC	11
16388	medial habenular nucleus	MHb	11
16389	medial subhabenular nucleus	MSHb	11
16391	medial part of the lateral habenular nucleus	LHbM	11
16392	lateral subhabenular nucleus	LSHb	11
16394	lateral part of the lateral habenular nucleus	LHbL	11
16400	anterior paraventricular nucleus of thalamus	PVA	11
16401	intermediodorsal nucleus	IMD	11
16402	centromedian nucleus	CM	11
16403	interanteromedial nucleus	IAM	11
16404	interanterodorsal nucleus	IAD	11
16405	rhomboid nucleus	Rh	11
16406	reuniens nucleus, main part	Re	11
16407	retroreuniens nucleus	RRe	11
16408	ventral reuniens nucleus	VRe	11
16410	paratenial nucleus	PT	11
16411	mediodorsal nucleus	MD	11
16415	intralaminar nuclei	IL	11
16419	anterior nuclei	A	11
16423	ventral nuclei	V	11
16434	laterodorsal nucleus	LD	11
16435	lateral posterior nucleus	LP	11
16436	dorsal lateral geniculate nucleus	DLG	11
16441	posterior paraventricular nucleus	PVP	11
16442	parafascicular nucleus	PF	11
16444	lithoid nucleus	Lth	11
16445	scaphoid nucleus	Sc	11
16446	ethmoid nucleus	Eth	11
16447	subethmoid nucleus	SEth	11
16448	ventral linear nucleus	VLi	11
16449	posterior triangular nucleus	PoT	11
16451	intermedioposterior nucleus	IPo	11
16452	suprageniculate nucleus	SG	11
16457	magnocellular (medial) subparafascicular nucleus	SPFMC	11
16459	parvicellular (lateral) subparafascicular nucleus	SPFPC	11
16460	posterior intralaminar nucleus	PIL	11
16462	medial geniculate nucleus	MG	11
16471	shell of p2ZL	p2ZLS	11
16473	interstitial nucleus of the zona limitans	IZL	11
16475	intergeniculate leaflet	IGL	11
16480	liminal nucleus	Lim	11
16482	reticular formation of p2Lim	p2LimRt	11
16484	p2 portion of the peripeduncular nucleus	p2PP	11
16485	epipeduncular nucleus	EpP	11
16491	p2 portion of the pre-Edinger-Westphal nucleus	p2PEW	11
16493	p2 part of the zona limitans core population	p2ZLC	11
16494	rostral interstitial nucleus	RI	11
16495	prerubral area	PR	11
16496	p2 portion of the parabrachial pigmented nucleus	p2PBP	11
16498	p2 portion of the medial terminal nucleus of the accessory optic tract	p2MT	11
16499	p2 portion of the substantia nigra pars compacta	p2SNC	11
16500	p2 portion of the substantia nigra pars reticulata	p2SNR	11
16501	p2 portion of paranigral nucleus	p2PN	11
16508	p2 portion of the ventral tegmental area	p2VTA	11
16514	subcommissural organ	SCO	11
16525	PcPD part of the periaqueductal gray	PcPD-PAG	11
16527	dorsofrontal pretectal nucleus	DF	11
16529	superficial dorsofrontal area	DFS	11
16534	PcPL part of the periaqueductal gray	PcPL-PAG	11
16536	anterior pretectal nucleus, dorsal core part	APTD	11
16538	anterior pretectal nucleus, dorsal superficial part	APTDS	11
16543	PcPV part of the periaqueductal gray	PcPV-PAG	11
16545	anterior pretectal nucleus, ventral core part	APTV	11
16547	anterior pretectal nucleus, ventral superficial part	APTVS	11
16553	JcPD part of the periaqueductal gray	JcPD-PAG	11
16555	dorsal juxtacommissural pretectal nucleus	DJcP	11
16556	dorsal spiriform nucleus	SpD	11
16558	JcP contribution to DT	JcP-DT	11
16563	JcPL part of the periaqueductal gray	JcPL-PAG	11
16565	reticular formation of JcPL	JcPLRt	11
16566	lateral spiriform nucleus	SpL	11
16568	JcP contribution to LTL	JcP-LTL	11
16573	JcPV part of the periaqueductal gray	JcPV-PAG	11
16575	ventral juxtacommissural pretectal nucleus	VJcP	11
16577	JcP contribution to LTV	JcP-LTV	11
16583	CoPD part of the periaqueductal gray	CoPD-PAG	11
16585	medial pretectal nucleus	MPT	11
16586	principal pretectal nucleus	PrPT	11
16587	reticular formation of CoPD	CoPDRt	11
16589	olivary pretectal nucleus	OPT	11
16590	dorsal terminal nucleus of the accessory optic tract	DT	11
16595	CoPL part of the periaqueductal gray	CoPL-PAG	11
16597	parvicellular interstitial nucleus of the posterior commissure	PCPC	11
16598	intermediate pretectal nucleus	IPT	11
16599	reticular formation of CoPL	CoPLRt	11
16601	lateral terminal nucleus of the accessory optic tract, lateral part	LTL	11
16606	CoPV part of the periaqueductal gray	CoPV-PAG	11
16608	subpretectal nucleus	SPT	11
16609	magnocellular interstitial nucleus of the posterior commissure	MCPC	11
16611	lateral terminal nucleus of the accessory optic tract, ventral part	LTV	11
16617	p1Lim part of periaqueductal gray	p1Lim-PAG	11
16619	reticular formation of p1Lim	p1LimRt	11
16620	interstitial nucleus of Cajal (post-migratory)	InC	11
16622	p1 part of the lateral substantia nigra	p1SNL	11
16628	p1B part of the periaqueductal gray	p1B-PAG	11
16629	nucleus of Darkschewitsch	Dk	11
16630	p1 part of the pre-Edinger-Westphal nucleus	p1PEW	11
16632	basal reticular formation of p1	p1BRt	11
16633	red nucleus, parvicellular part	RPC	11
16634	p1 part of the pararubral nucleus	p1PaR	11
16635	p1 part of parabrachial pigmented nucleus	p1PBP	11
16637	p1 part of the medial terminal nucleus of the accessory optic tract	p1MT	11
16638	p1 part of the substantia nigra compacta	p1SNC	11
16639	p1 part of the substantia nigra reticulata	p1SNR	11
16640	p1 portion of the paranigral nucleus	p1PN	11
16645	p1F part of periaqueductal gray	p1F-PAG	11
16648	p1 part of the ventral tegmental area	p1VTA	11
16655	bed of the tectal gray commissure	BTGC	11
16656	bed of the tectal commissure	BTC	11
16657	bed of the intercollicular commissure	BICC	11
16663	m1AD (DM) part of periaqueductal gray	m1AD-PAG	11
16665	ventral paracommissural tectal nucleus, m1 part	m1VPaC	11
16667	dorsal paracommissural tectal nucleus, m1 part	m1DPaC	11
16673	dorsolateral TG part of the periaqueductal gray	TGDL-PAG	11
16675	central layers of TG	TGC	11
16677	superficial layers of TG	TGS	11
16682	dorsolateral SC part of the periaqueductal gray	SCDL-PAG	11
16683	deep white layer of SC	DpWh	11
16685	deep gray layer of SC	DpG	11
16686	intermediate white layer of SC	InWh	11
16687	intermediate gray layer of SC	InG	11
16689	optic fiber layer of SC	Op	11
16690	superficial gray layer of SC	SuG	11
16691	zonal layer of SC	Zo	11
16696	dorsolateral IC periaqueductal gray	ICDL-PAG	11
16698	central nucleus of the inferior colliculus	CIC	11
16700	internal cortical nucleus of inferior colliculus	ICIC	11
16701	dorsal cortical nucleus of inferior colliculus	DCIC	11
16702	external cortical nucleus of inferior colliculus	ECIC	11
16707	lateral TG part of the periaqueductal gray	TGL-PAG	11
16708	lateral SC part of the periaqueductal gray	SCL-PAG	11
16709	lateral IC periaqueductal gray	ICL-PAG	11
16711	nucleus of the inferior collicular brachium, rostral part	ICBR	11
16712	nucleus of the inferior collicular brachium, caudal part	ICBC	11
16714	subbrachial nucleus, rostral part	SubBR	11
16715	subbrachial nucleus, caudal part	SubBC	11
16721	m1Lim (VL) part of the periaqueductal gray	m1Lim-PAG	11
16723	m1Lim part of the midbrain reticular formation	m1LimRt	11
16730	m1B part of the periaqueductal gray	m1B-PAG	11
16731	m1 part of the pre-Edinger-Westphal nucleus	m1PEW	11
16733	oculomotor nucleus, Edinger-Westphal subnucleus	3EW	11
16734	oculomotor nucleus, main part	3M	11
16735	medial basal reticular formation of m1	m1BRt	11
16736	pararubral nucleus, m1 part	m1PaR	11
16737	red nucleus, magnocellular part	RMC	11
16739	m1 part of paranigral nucleus	m1PN	11
16740	substantia nigra compacta, m1 part	m1SNC	11
16741	substantia nigra reticulata, m1 part	m1SNR	11
16746	m1F part of the periaqueductal gray	m1F-PAG	11
16748	rostral linear nucleus	RLi	11
16750	ventral tegmental area, m1 part	m1VTA	11
16759	dorsal preisthmic part of periaqueductal gray	PIsD-PAG	11
16766	dorsolateral preisthmic part of periaqueductal gray	PIsDL-PAG	11
16768	nucleus sagulum, deep part	SagD	11
16770	nucleus sagulum, superficial part	SagS	11
16775	lateral part of preisthmic periaqueductal gray	PIsL-PAG	11
16777	cuneiform nucleus	CnF	11
16779	superficial cuneiform nucleus	CnFS	11
16785	liminal periaqueductal gray of m2	m2Lim-PAG	11
16787	subcuneiform nucleus	SCnF	11
16788	liminal reticular formation of m2	m2LimRt	11
16795	basal m2 periaqueductal gray	m2B-PAG	11
16796	m2 part of the dorsal raphe nucleus	m2DR	11
16798	reticular formation of basal m2	m2BRt	11
16799	m2 part of pararubral nucleus	m2PaR	11
16801	m2 part of paranigral nucleus	m2PN	11
16802	m2 part of nucleus parabrachialis pigmentosus	m2PBP	11
16803	m2 part of substantia nigra compacta	m2SNC	11
16804	m2 part of substantia nigra reticulata	m2SNR	11
16806	m2 part of VTA	m2VTA	11
16807	interfascicular nucleus	IF	11
16820	white matter of cerebellar vermis	CbVWM	11
16822	cerebellar nuclei of CbV	CbVN	11
16827	isthmic vestibulocerebellar nucleus	isVeCb	11
16829	cortex of cerebellar vermis	CbVCx	11
16848	parabrachial part of the periaqueductal gray	PB-PAG	11
16850	medial parabrachial nucleus	MPB	11
16852	lateral parabrachial nucleus	LPB	11
16853	Koelliker-Fuse nucleus	KF	11
16858	isthmic part of the periaqueductal gray	Ist-PAG	11
16860	dorsal nucleus of the lateral lemniscus	DLL	11
16862	parabigeminal nucleus	PBG	11
16863	perilemniscal isthmic area	PeLA	11
16869	isthmic liminal part of the periaqueductal gray	isLim-PAG	11
16870	isthmic part of mesencephalic trigeminal nucleus	isMes5	11
16872	microcellular tegmental nucleus	MiTg	11
16873	isthmic liminal reticular area	isLimRt	11
16875	isthmic part of the intermediate lateral lemniscal nucleus	isILL	11
16881	dorsolateral isthmic part of the dorsal raphe nucleus	isDRDL	11
16883	isthmic part of basolateral isthmic reticular formation	isBLRt	11
16884	retrorubral field	RRF	11
16886	paralemniscal isthmic area	isPaL	11
16891	intermediate isthmic part of the dorsal raphe nucleus	isDRI	11
16892	isthmic part of mediodorsal tegmental nucleus	isMDTg	11
16894	basointermediate isthmic reticular formation	isBIRt	11
16896	substantia nigra reticulata, isthmic part	isSNR	11
16901	ventral isthmic part of dorsal raphe nucleus	isDRV	11
16903	trochlear nucleus	4M	11
16904	trochlear shell	4Sh	11
16905	paratrochlear nucleus	Pa4	11
16906	caudal linear (raphe) nucleus	CLi	11
16908	substantia nigra compacta, isthmic part	isSNC	11
16909	interpeduncular nucleus, prodromal part	IPPr	11
16910	isthmic portion of paranigral nucleus	isPN	11
16914	ventral tegmental area, isthmic part	isVTA	11
16917	cerebellar choroid tela	CbCh	11
16918	rhombic lip of r1R	r1RhL	11
16921	external granular layer of CbH	CbH-EGL	11
16923	rhombic lip of CbH	CbHLip	11
16926	cerebellar white matter	CbHWM	11
16928	cerebellar nuclei of CbH	CbHN	11
16936	r1 part of vestibulocerebellar nucleus	r1VeCb	11
16937	A4 noradrenergic cell group	A4	11
16939	cortex of cerebellar hemisphere	CbHCx	11
16953	r1 part of superior vestibular nucleus	r1SuVe	11
16957	r1 part of principal trigeminal sensory nucleus	r1Pr5	11
16958	r1 part of dorsal parvicellular reticular formation	r1DPCRt	11
16962	r1 part of ventral parvicellular reticular formation	r1VPCRt	11
16963	r1 liminal central gray	r1LimCG	11
16964	laterodorsal tegmental nucleus	LDTg	11
16965	pedunculopontine tegmental nucleus	PPTg	11
16966	r1 part of the 'mesencephalic' trigeminal nucleus	r1Mes5	11
16972	locus coeruleus	LC	11
16973	nucleus of Barrington	Bar	11
16974	neuropeptide-S nucleus	NPS	11
16976	r1 part of central gray	r1CG	11
16977	supratrigeminal nucleus	Su5	11
16978	r1 part of basolateral reticular formation	r1BLRt	11
16979	r1 part of medial paralemniscal nucleus	r1MPL	11
16980	r1 part of lateral paralemniscal nucleus	r1LPaL	11
16982	r1 part of intermediate nucleus of the lateral lemniscus	r1ILL	11
16983	retrorubral nucleus (superficial part of PPTg)	RR	11
16988	r1 part of basointermediate central gray	r1BICG	11
16989	r1 part of mediodorsal tegmental nucleus	r1MDTg	11
16991	r1 part of basointermediate reticular formation	r1BIRt	11
16992	nucleus subcoeruleus, r1 part	r1SubC	11
16998	r1 part of dorsal raphe nucleus	r1DR	11
16999	sphenoid nucleus	Sph	11
17000	dorsal tegmental nucleus	DTg	11
17003	r1 basomedial central gray	r1BMCG	11
17005	apical interpeduncular nucleus	IPA	11
17006	rhabdoid interpeduncular nucleus	Rbd	11
17007	ventral tegmental nucleus	VTg	11
17008	anterior tegmental nucleus	ATg	11
17009	posterior tegmental nucleus	PTg	11
17010	r1 part of paramedian raphe nucleus	r1PMnR	11
17011	r1 part of median raphe nucleus	r1MnR	11
17012	r1 part of basomedial reticular formation	r1BMRt	11
17014	rostral interpeduncular nucleus	IPR	11
17018	caudal interpeduncular nucleus	IPC	11
17029	r2 part of dorsal cochlear nucleus	r2DC	11
17030	r2 part of anteroventral cochlear nucleus	r2AVC	11
17034	r2 part of superior vestibular nucleus	r2SuVe	11
17039	r2 part of principal trigeminal sensory nucleus	r2Pr5	11
17040	r2 part of trigeminal transition zone	r2-5Tr	11
17041	r2 part of dorsal parvicellular reticular formation	r2DPCRt	11
17045	r2 part of the trigeminal motor nucleus	r2-5M	11
17050	r2 liminal central gray	r2LimCG	11
17051	r2 part of the ventral parvicellular reticular formation	r2VPCRt	11
17052	A7 noradrenergic cell group	A7	11
17059	r2 part of nucleus subcoeruleus	r2SubC	11
17060	r2 part of medial paralemniscal nucleus	r2MPL	11
17061	r2 part of lateral paralemniscal nucleus	r2LPL	11
17062	r2 part of basolateral reticular formation	r2BLRt	11
17064	r2 part of ventral lateral lemniscal nucleus	r2VLL	11
17065	B9 serotonergic cell group	B9	11
17070	r2 part of central gray	r2BICG	11
17073	r2 part of BI intermediate zone	r2BIIZ	11
17075	dorsomedial tegmental nucleus	DMTg	11
17076	r2 part of basointermediate reticular formation	r2BIRt	11
17077	r2 part of paramedian raphe nucleus	r2PMnR	11
17083	posterodorsal tegmental nucleus	PDTg	11
17084	nucleus incertus	Inc	11
17086	r2 part of basomedial reticular formation	r2BMRt	11
17087	r2 part of prepontine raphe nucleus	r2PPnR	11
17088	r2 part of median raphe nucleus	r2MnR	11
17090	rostromedial tegmental nucleus	RMTg	11
17099	r3 part of dorsal cochlear nucleus	r3DC	11
17100	r3 part of anteroventral cochlear nucleus	r3AVC	11
17104	r3 part of lateral vestibular nucleus	r3LVe	11
17105	r3 part of magnocellular medial vestibular nucleus	r3MVeMC	11
17106	r3 part of parvicellular medial vestibular nucleus	r3MVePC	11
17110	r3 part of spinal trigeminal sensory column, oral part	r3Sp5O	11
17111	r3 part of trigeminal transition zone	r3-5Tr	11
17112	r3 part of dorsal parvicellular reticular formation	r3DPCRt	11
17116	r3 part of the trigeminal motor nucleus	r3-5M	11
17118	r3 part of ventral lateral lemniscal nucleus	r3VLL	11
17119	r3 part of medial paralemniscal nucleus	r3MPL	11
17120	r3 part of lateral paralemniscal nucleus	r3LPL	11
17121	r3 part of ventral parvicellular reticular formation	r3VPCRt	11
17122	r3 liminal central gray	r3LimCG	11
17128	r3 part of basolateral central gray	r3BLCG	11
17130	r3 part of basolateral reticular formation	r3BLRt	11
17136	r3 part of central gray nucleus alpha	r3CGA	11
17137	r3 part of central gray nucleus beta	r3CGB	11
17138	r3 part of BI intermediate zone	r3BIIZ	11
17140	r3 part of basointermediate reticular formation	r3BIRt	11
17142	r3 part of lateral pontine nuclei	r3LPn	11
17147	r3 part of preabducens central gray	r3Pre6CG	11
17149	r3 pontine raphe nucleus	r3PnR	11
17150	r3 part of reticulotegmental nucleus, shell portion	r3RtTgS	11
17151	r3 part of reticulotegmental nucleus, core portion	r3RtTgC	11
17152	r3 part of basomedial reticular formation	r3BMRt	11
17154	r3 part of medial pontine nuclei	r3MPn	11
17162	r4 part of dorsal cochlear nucleus	r4DC	11
17163	r4 part of posteroventral cochlear nucleus	r4PVC	11
17167	r4 part of lateral vestibular nucleus	r4LVe	11
17168	r4 part of magnocellular medial vestibular nucleus	r4MVeMC	11
17169	r4 part of parvocellular medial vestibular nucleus	r4MVePC	11
17173	r4 part of descending trigeminal sensory nucleus, oral part	r4Sp5O	11
17174	r4 part of trigeminal transition zone	r4-5Tr	11
17175	r4 part of dorsal parvicellular reticular formation	r4DPCRt	11
17179	r4 liminal central gray	r4LimCG	11
17180	r4 part of ventral parvicellular reticular formation	r4VPCRt	11
17181	r4 part of A5 noradrenergic cell group	r4A5	11
17187	r4 part of basolateral intermediate zone	r4BLIZ	11
17189	efferent vestibular nucleus	EVe	11
17190	supragenual nucleus	SGe	11
17191	r4 part of basolateral reticular formation	r4BLRt	11
17193	r4 part of ventral lateral lemniscal nucleus	r4VLL	11
17194	r4 part of medial paralemniscal nucleus	r4MPL	11
17195	r4 part of lateral paralemniscal nucleus	r4LPL	11
17200	r4 part of basointermediate intermediate zone	r4BIIZ	11
17201	r4 part of central gray nucleus alpha	r4CGA	11
17202	r4 part of central gray nucleus beta	r4CGB	11
17204	r4 part of basointermediate reticular formation	r4BIRt	11
17206	r4 part of lateral pontine nuclei	r4LPn	11
17211	r4 part of preabducens central gray	r4Pre6CG	11
17213	r4 part of reticulotegmental nucleus, shell portion	r4RtTgS	11
17214	r4 part of reticulotegmental nucleus, core portion	r4RtTgC	11
17215	r4 part of basomedial reticular formation	r4BMRt	11
17216	r4 part of pontine raphe cell population	r4PnR	11
17218	r4 part of medial pontine nuclei	r4MPn	11
17227	r5 part of dorsal cochlear nucleus	r5DC	11
17228	r5 part of posteroventral cochlear nucleus	r5PVC	11
17232	r5 part of spinal vestibular nucleus	r5SpVe	11
17233	r5 part of magnocellular medial vestibular nucleus	r5MVeMC	11
17234	r5 part of parvocellular medial vestibular nucleus	r5MVePC	11
17238	r5 part of the oral Sp5 subnucleus	r5Sp5O	11
17239	r5 part of trigeminal transition zone	r5-5Tr	11
17240	r5 (gustatory) part of solitary complex	r5Sol	11
17241	r5 part of dorsal parvicellular reticular formation	r5DPCRt	11
17245	r5 liminal central gray	r5LimCG	11
17246	r5 part of ventral parvicellular reticular formation	r5VPCRt	11
17247	r5 part of A5 noradrenergic cell group	r5A5	11
17248	superior salivatory parasympathetic nucleus	SS	11
17249	nucleus of the central acoustic tract	CAT	11
17255	r5 part of basolateral intermediate zone	r5BLIZ	11
17257	r5 part of basolateral reticular formation	r5BLRt	11
17259	r5 part of ventral lateral lemniscal nucleus	r5VLL	11
17260	dorsal periolivary nucleus	DPeO	11
17261	lateral superior olive	LSO	11
17262	medial superior olive	MSO	11
17263	rostral periolivary nucleus	RPeO	11
17264	superior periolivary nucleus	SPeO	11
17265	ventrolateral periolivary nucleus	VLPeO	11
17270	r5 part of basointermediate intermediate zone	r5BIIZ	11
17272	r5 part of basointermediate reticular formation	r5BIRt	11
17274	lateral trapezoid nucleus	LTz	11
17279	abducens motor nucleus	6M	11
17281	para-abducens nucleus	Pa6	11
17282	retropontine reticular area	RPnRt	11
17283	r5 part of basomedial reticular formation	r5BMRt	11
17284	nucleus raphe magnus, r5 part	r5RM	11
17285	nucleus raphe interpositus	RIP	11
17287	medial trapezoid nucleus	MTz	11
17288	ventromedial periolivary nucleus	VMPeO	11
17296	r6 part of dorsal cochlear nucleus	r6DC	11
17297	r6 part of posteroventral cochlear nucleus	r6PVC	11
17301	r6 part of spinal vestibular nucleus	r6SpVe	11
17302	r6 part of magnocellular medial vestibular nucleus	r6MVeMC	11
17303	r6 part of parvocellular medial vestibular nucleus	r6MVePC	11
17307	r6 part of spinal trigeminal nucleus, pars oralis	r6Sp5O	11
17308	r6 part of trigeminal transition zone	r6-5Tr	11
17309	r6 (gustatory) part of solitary complex	r6Sol	11
17310	r6 part of dorsal parvicellular reticular formation	r6DPCRt	11
17314	r6 liminal central gray	r6LimCG	11
17315	r6 part of ventral parvicellular reticular formation	r6VPCRt	11
17316	inferior salivatory parasympathetic nucleus	IS	11
17317	facial motor nucleus	7M	11
17323	r6 part of basolateral intermediate zone	r6BLIZ	11
17325	r6 part of the basolateral reticular formation	r6BLRt	11
17327	retrotrapezoid nucleus	RTZ	11
17332	r6 part of basointermediate intermediate zone	r6BIIZ	11
17334	r6 part of basointermediate reticular formation	r6BIRt	11
17336	r6 part of paragigantocellular nucleus	r6PGi	11
17337	r6 part of rostral ventromedial reticular area	r6RVM	11
17342	r6 part of nucleus prepositus	r6Pr	11
17344	r6 part of basomedial reticular formation	r6BMRt	11
17345	raphe magnus nucleus, r6 part	r6RM	11
17346	r6 part of gigantocellular reticular area	r6Gi	11
17347	r6 part of ventral gigangocellular reticular area	r6GiV	11
17349	r6 part of nucleus raphe pallidus	r6-RP	11
17350	r6 part of parapyramidal nucleus	r6PPy	11
17359	r7 part of the dorsal cochlear nucleus	r7DC	11
17360	r7 part of the posteroventral cochlear nucleus	r7PVC	11
17364	r7 part of spinal vestibular nucleus	r7SpVe	11
17365	r7 part of parvocellular medial vestibular nucleus	r7MVePC	11
17369	r7 part of spinal trigeminal nucleus, interpolar part	r7Sp5I	11
17370	r7 part of trigeminal transition zone	r7-5Tr	11
17371	r7 (gustatory) part of solitary complex	r7Sol	11
17372	r7 part of dorsal parvicellular reticular formation	r7DPCRt	11
17376	r7 liminal central gray	r7LimCG	11
17377	vagal motor nucleus	r7-10M	11
17378	r7 portion of ambiguous motor nucleus	r7Amb	11
17379	r7 part of ventral parvicellular reticular formation	r7VPCRt	11
17385	r7 part of the basolateral intermediate zone	r7BLIZ	11
17387	r7 part of basolateral reticular formation	r7BLRt	11
17389	rostral ventrolateral reticular area	RVL	11
17394	r7 part of the basointermediate intermediate zone	r7BIIZ	11
17396	r7 part of the basointermediate reticular formation	r7BIRt	11
17398	r7 part of paragigantocellular nucleus	r7PGi	11
17399	r7 part of rostral ventromedial reticular area	r7RVM	11
17404	r7 part of nucleus prepositus	r7Pr	11
17405	r7 portion of the hypoglossal motor nucleus	r7-12M	11
17406	r7 part of the nucleus of Roller	r7Ro	11
17408	r7 raphe obscurus cell population	r7-RO	11
17409	r7 part of basomedial reticular formation	r7BMRt	11
17410	r7 part of gigantocellular reticular area	r7Gi	11
17411	r7 part of ventral gigangocellular reticular area	r7GiV	11
17413	r7 raphe pallidus cell population	r7-RP	11
17414	r7 part of parapyramidal nucleus	r7PPy	11
17422	r8 part of spinal vestibular nucleus	r8SpVe	11
17423	r8 part of parvocellular medial vestibular nucleus	r8MVePC	11
17427	r8 part of spinal trigeminal nucleus, interpolar part	r8Sp5I	11
17428	r8 part of trigeminal transition zone	r8-5Tr	11
17429	r8 (gustatory) part of solitary complex	r8Sol	11
17430	r8 part of dorsal parvicellular reticular formation	r8DPCRt	11
17434	r8 part of ventral parvicellular reticular formation	r8VPCRt	11
17435	r8 portion of vagal motor nucleus	r8-10M	11
17436	r8 portion of ambiguous motor nucleus	r8Amb	11
17442	r8 part of basolateral intermediate zone	r8-BLIZ	11
17444	r8 part of basolateral reticular formation	r8BLRt	11
17446	r8 part of lateral reticular nucleus	r8LRt	11
17447	parvocellular part of r8LRt	r8LRtPC	11
17448	r8 part of linear nucleus	r8Li	11
17453	r8 part of basointermediate intermediate zone	r8BIIZ	11
17454	r8 part of nucleus intercalatus Staderini	r8IS	11
17456	r8 part of basointermediate reticular formation	r8BIRt	11
17458	r8 part of rostral ventromedial reticular area	r8RVM	11
17459	r8 part of the paragigantocellular nucleus	r8PGi	11
17464	r8 part of nucleus prepositus	r8Pr	11
17465	r8 portion of the hypoglossal motor nucleus	r8-12M	11
17466	r8 part of nucleus of Roller	r8Ro	11
17468	r8 raphe obscurus cell population	r8-RO	11
17469	r8 part of basomedial reticular formation	r8BMRt	11
17470	r8 part of gigantocellular reticular area	r8Gi	11
17471	r8 part of ventral gigangocellular reticular area	r8GiV	11
17473	r8 raphe pallidus cell population	r8-RP	11
17474	r8 part of inferior olive	r8-IO	11
17482	r9 part of spinal vestibular nucleus	r9SpVe	11
17483	r9 part of parvocellular medial vestibular nucleus	r9MVePC	11
17484	r9 part of external cuneate nucleus	r9ECu	11
17488	r9 part of spinal trigeminal nucleus, interpolar part	r9Sp5I	11
17489	r9 part of trigeminal transition zone	r9-5Tr	11
17490	r9 (gustatory) part of solitary complex	r9Sol	11
17491	r9 part of nucleus gracilis	r9Gr	11
17492	r9 part of nucleus cuneatus	r9Cu	11
17493	r9 part of dorsal parvicellular reticular formation	r9DPCRt	11
17497	r9 part of ventral parvicellular reticular formation	r9VPCRt	11
17498	r9 portion of vagal motor nucleus (postmigratory)	r9-10M	11
17499	r9 portion of ambiguous motor nucleus (postmigratory)	r9Amb	11
17505	r9 part of the basolateral intermediate zone	r9BLIZ	11
17507	r9 part of the basolateral reticular formation	r9BLRt	11
17509	r9 part of the lateral reticular nucleus	r9LRt	11
17510	parvocellular part of the r9LRt	r9LRtPC	11
17511	r9 part of linear nucleus	r9Li	11
17516	r9 part of basointermediate intermediate zone	r9BIIZ	11
17517	r9 part of nucleus intercalatus Staderini	r9IS	11
17519	r9 part of basointermediate reticular formation	r9BIRt	11
17521	r9 part of paragigantocellular nucleus	r9PGi	11
17522	r9 part of rostral ventromedial reticular area	r9RVM	11
17527	r9 portion of the hypoglossal motor nucleus	r9-12M	11
17528	r9 part of nucleus of Roller	r9Ro	11
17530	r9 raphe obscurus cell population	r9-RO	11
17531	r9 part of basomedial reticular formation	r9BMRt	11
17532	r9 part of gigantocellular reticular area	r9Gi	11
17533	r9 part of ventral gigangocellular reticular area	r9GiV	11
17535	r9 raphe pallidus cell population	r9-RP	11
17536	r9 part of the inferior olive	r9-IO	11
17544	r10 part of spinal vestibular nucleus	r10SpVe	11
17545	r10 part of parvocellular medial vestibular nucleus	r10MVePC	11
17546	r10 part of external cuneate nucleus	r10ECu	11
17550	r10 part of spinal trigeminal nucleus, caudal part	r10Sp5C	11
17551	r10 part of trigeminal transition zone	r10-5Tr	11
17552	r10 part of solitary complex	r10Sol	11
17553	r10 part of nucleus gracilis	r10Gr	11
17554	r10 part of nucleus cuneatus	r10Cu	11
17555	r10 part of dorsal parvicellular reticular formation	r10DPCRt	11
17559	r10 part of ventral parvicellular reticular formation	r10VPCRt	11
17560	r10 part of vagal motor nucleus	r10-10M	11
17561	r10 portion of ambiguous motor nucleus	r10Amb	11
17567	r10 part of the basolateral intermediate zone	r10BLIZ	11
17569	r10 part of basolateral reticular formation	r10BLRt	11
17575	r10 part of nucleus intercalatus Staderini	r10IS	11
17576	r10 part of basointermediate intermediate zone	r10BIIZ	11
17578	r10 part of accessory motor nucleus	r10-11M	11
17579	r10 part of basointermediate reticular formation	r10BIRt	11
17585	r10 portion of the hypoglossal motor nucleus	r10-12M	11
17586	r10 part of nucleus of Roller	r10Ro	11
17588	r10 raphe obscurus cell population	r10-RO	11
17589	r10 part of basomedial reticular formation	r10BMRt	11
17590	r10 part of gigantocellular reticular area	r10Gi	11
17591	r10 part of ventral gigangocellular reticular area	r10GiV	11
17593	r10 raphe pallidus cell population	r10-RP	11
17594	r10 part of the inferior olive	r10-IO	11
17602	r11 part of the external uneate nucleus	r11ECu	11
17606	r11 part of spinal trigeminal nucleus, caudal part	r11Sp5C	11
17607	r11 part of trigeminal transition zone	r11-5Tr	11
17608	r11 part of solitary complex	r11Sol	11
17609	r11 part of nucleus gracilis	r11Gr	11
17610	r11 part of nucleus cuneatus	r11Cu	11
17611	r11 part of dorsal parvicellular reticular formation	r11DPCRt	11
17615	r11 liminal central gray	r11LimCG	11
17616	r11 part of ventral parvicellular reticular formation	r11VPCRt	11
17617	r11 part of vagal motor nucleus (postmigratory)	r11-10M	11
17618	r11 part of the accessory motor nucleus (postmigratory)	r11-11M	11
17619	r11 part of nucleus ambiguous	r11Amb	11
17625	r11 part of the basolateral intermediate zone	r11BLIZ	11
17627	r11 part of basolateral reticular formation	r11BLRt	11
17633	r11 part of basointermediate intermediate zone	r11BIIZ	11
17634	r11 part of accessory motor nucleus	r11-11	11
17636	r11 part of basointermediate reticular formation	r11BIRt	11
17642	r11 part of hypoglossal motor nucleus	r11-12M	11
17644	r11 part of nucleus raphe obscurus	r11-RO	11
17645	r11 part of basomedial reticular formation	r11BMRt	11
17646	r11 part of gigantocellular reticular area	r11Gi	11
17647	r11 part of ventral gigangocellular reticular area	r11GiV	11
17649	r11 part of nucleus raphe pallidus	r11-RP	11
17658	alar medial part of Rexed's layer 10	AM10Sp	11
17660	cornucommissural part of Rexed's layer 4	4SpCC	11
17661	internal basilar (cervical) nucleus	IB	11
17662	dorsal (thoracic) nucleus of Clarke	Dth	11
17663	lumbar dorsal commissural nucleus	LuDCom	11
17664	sacral dorsal commissural nucleus	SDCom	11
17668	alar lateral part of Rexed's layer 10	AL10Sp	11
17672	Rexed's layer 3	3Sp	11
17673	Rexed's layer 4 (main or lateral part)	4SpL	11
17675	Rexed's layer 1 (marginal layer)	1Sp	11
17676	Rexed's layer 2 (gelatinous substance)	2Sp	11
17681	alar ventral part of Rexed's layer 10	AV10Sp	11
17683	Rexed's layer 5 (neck of dorsal horn)	5Sp	11
17686	Rexed's layer 6 (basis of dorsal horn)	6Sp	11
17690	lateral spinal nucleus	LSpin	11
17691	lateral cervical nucleus	LatC	11
17697	basal lateral part of Rexed's layer 10	BL10Sp	11
[truncated: 246 more rows]
